# Supplementary material for: Peralkynylated Tetraazaacene Derivatives
Source: PubMed Central journal article supplement (PMC7028064; doi:10.1002/chem.201904087), 2019-12-16
Supplement: CHEM-26-1013-s001.pdf [file CHEM-26-1013-s001.pdf]

# CHEMISTRY

## A **European** Journal

### Supporting Information

#### **Peralkynylated Tetraazaacene Derivatives**

Hilmar Reiss,<sup>[a]</sup> Frank Rominger,<sup>[a]</sup> Jan Freudenberg,<sup>[a, c]</sup> and Uwe H. F. Bunz\*<sup>[a, b]</sup>

chem\_201904087\_sm\_miscellaneous\_information.pdf

## SUPPORTING INFORMATION

## Table of Contents

|                         |    |
|-------------------------|----|
| Experimental Procedures | 2  |
| Optical Spectroscopy    | 7  |
| Cyclic Voltammetry      | 11 |
| Calculations            | 12 |
| NMR-Spectra             | 13 |
| IR-Spectra              | 25 |
| Crystallographic Data   | 32 |
| References              | 34 |

## Experimental Procedures

## General Procedures, General Purification

Reagents and solvents were obtained from commercial suppliers and used without further purification. For chromatographic purifications, manual column chromatography (SiO<sub>2</sub>, grain size of 0.04-0.063 mm) was used. NMR spectra were recorded on Bruker Avance Spectrometers using the specified frequency. Chemical shifts ( $\delta$ ) are given in parts per million (ppm) relative to internal solvent signals.<sup>[1]</sup> The following abbreviations describe the signal multiplicities: s = singlet, m= multiplet. High-resolution mass spectra (HRMS) were obtained by matrix-assisted laser desorption/ionization (MALDI), electrospray ionisation (ESI) or direct analysis in real time (DART) experiments. IR Spectra were recorded from powder of the respective analyte on a Jasco FT/IR-4100 spectrometer. CV measurements were performed on a VersaSTAT 3 potentiostat by Princeton Applied Research. UV-vis spectra were recorded on a Jasco V670. Computational studies were carried out using DFT calculations on Turbomole 6.3.1 or Gaussian 09. Geometry optimizations were performed using the B3LYP functional and def2-TZVP basis set. At this geometry, the absolute energy and FMO energies were assigned by a single-point approach at the B3LYP/6-311++G\*\* level.<sup>[2]</sup>

## Synthetic procedures

**Procedure for stannylacetylenes:** The stannylacetylenes were prepared according to the literature.<sup>[3]</sup> In a heat-gun dried Schlenk tube under argon atmosphere the alkyne (1 equiv.) was dissolved in abs. Et<sub>2</sub>O and cooled to -78 °C before it was treated with 1.05 equiv. of *n*-BuLi (2.5 M in hexane). The reaction was stirred for 1 h at this temperature then 1.10 equiv. of Me<sub>3</sub>SnCl (1 M in THF) were added. Stirring over night at room temperature followed by aqueous workup, extraction with Et<sub>2</sub>O, drying with magnesium sulfate and removal of the solvent gave the stannylacetylene, which was used without further purification.

**General Procedure 1 (GP1):** The N,N'-dihydroazaacene was dissolved in DCM and 10 equiv. of MnO<sub>2</sub> were added. After complete conversion of the starting material the reaction mixture was filtered through Celite and the solvent was evaporated under reduced pressure. The crude product was purified by column chromatography.

**General Procedure 2 (GP2):** In a heat-gun dried Schlenk tube under argon atmosphere the thiadiazolophenazine derivative was dissolved in abs. THF / abs. MeOH (40:1). At -10 °C Sml<sub>2</sub> (0.1 M in THF, 12 equiv.) was added dropwise. After 10 minutes at this temperature the mixture was poured into sat. aqueous NaCl solution. Et<sub>2</sub>O was used for extraction. The combined organic phases

## SUPPORTING INFORMATION

were washed with sat. aqueous  $\text{Na}_2\text{S}_2\text{O}_3$  solution, then dried over magnesium sulfate. After evaporation of the solvent under reduced pressure, the crude product was purified by column chromatography.

**6,7,8,9-Tetrabromo-4,11-bis((triisopropylsilyl)ethynyl)-[1,2,5]thiadiazolo[3,4-b]phenazine 2**
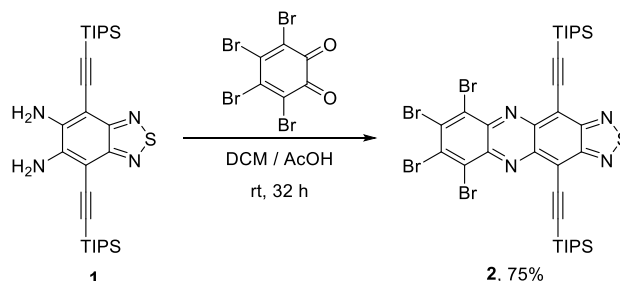

**1** (250 mg, 474  $\mu\text{mol}$ , 1 equiv.) and tetrabromoorthoquinone (241 mg, 569  $\mu\text{mol}$ , 1.2 equiv.) were stirred for 32 h in 5.00 mL of DCM / AcOH (1:1) at room temperature. The mixture was poured into DI water and extracted with DCM. The organic phases were treated with sat. aqueous sodium bicarbonate and dried over magnesium sulfate. After evaporation of the solvent under reduced pressure, the crude product was purified by chromatography on silica using PE / DCM 9:1  $\rightarrow$  5:1 as eluent to give the product as a dark green crystalline solid (326 mg, 356  $\mu\text{mol}$ , 75 %). M.p.: 258  $^{\circ}\text{C}$ .  $^1\text{H}$  NMR (500 MHz,  $\text{CDCl}_3$ ):  $\delta$  [ppm] = 1.31-1.28 (m, 42H).  $^{13}\text{C}$  ( $^1\text{H}$ ) NMR (100 MHz,  $\text{CDCl}_3$ ):  $\delta$  [ppm] = 156.0, 142.3, 141.3, 133.1, 129.0, 115.2, 113.9, 101.7, 19.1, 11.8. IR (neat):  $\nu$  [ $\text{cm}^{-1}$ ] = 2939, 2861, 1550, 1442, 1402, 1363, 1339, 1231, 1186, 1156, 1132, 1067, 1042, 1026, 994, 941, 918, 881, 854, 811, 754, 670, 612, 566, 535, 507, 489, 452, 415. HR-MS (ESI-):  $m/z$  calcd. for  $\text{C}_{34}\text{H}_{42}\text{Br}_4\text{N}_4\text{SSi}_2$ : 909.9408; found: 909.9423. UV-Vis:  $\lambda_{\text{max, abs}}$  (hexane) = 673 nm.

**4,11-Bis((triisopropylsilyl)ethynyl)-6,7,8,9-tetrakis((trimethylsilyl)ethynyl)-5,10-dihydro-[1,2,5]thiadiazolo[3,4-b]phenazine 3a-H<sub>2</sub>**
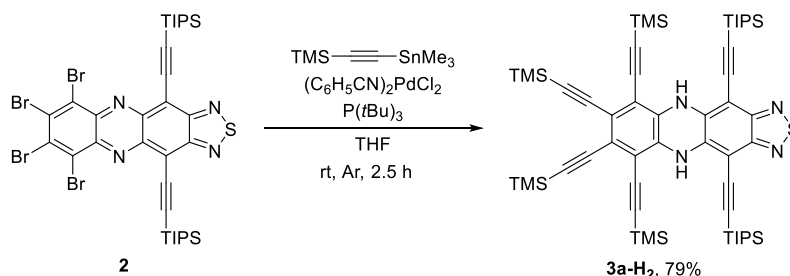

Bis(benzonitrile)palladium(II) dichloride (16.8 mg, 43.7  $\mu\text{mol}$ , 0.1 equiv.) was placed in a Schlenk tube and transferred into a glove-box under nitrogen atmosphere. 10.0 mL abs. THF were added followed by  $\text{P}(\text{t-Bu})_3$  (17.7 mg, 87.5  $\mu\text{mol}$ , 0.2 equiv.). The Schlenk tube was closed and taken outside the glove-box. Then, against a counter-flow of argon, **2** (400 mg, 437  $\mu\text{mol}$ , 1 equiv.) and trimethyl((trimethylstannyl)ethynyl)silane (1.37 g, 5.25 mmol, 12 equiv.) were added and the reaction mixture stirred at room temperature for 2.5 h. After adding DI water, extraction with DCM and drying of the organic phases over magnesium sulfate, the crude solution was filtered through a pad of silica. The solvent was evaporated under reduced pressure and the crude product was purified by chromatography on silica using PE / DCM 20:1  $\rightarrow$  10:1  $\rightarrow$  5:1 as eluent to give the product as a red solid (340 mg, 345  $\mu\text{mol}$ , 79%). M.p.: 280  $^{\circ}\text{C}$  decomp..  $^1\text{H}$  NMR (600 MHz,  $\text{CDCl}_3$ ):  $\delta$  [ppm] = 7.23 (s, 2H), 1.19-1.17 (m, 42H), 0.31 (s, 18H), 0.28 (s, 18H).  $^{13}\text{C}$  ( $^1\text{H}$ ) NMR (150 MHz,  $\text{CDCl}_3$ ):  $\delta$  [ppm] = 153.1, 136.2, 129.5, 123.4, 109.1, 108.3, 106.7, 102.2, 101.6, 98.1, 97.6, 94.4, 19.0, 11.7, 0.5, 0.5. IR (neat):  $\nu$  [ $\text{cm}^{-1}$ ] = 3355, 2942, 2864, 2146, 1563, 1457, 1405, 1374, 1317, 1280, 1246, 1040, 929, 881, 838, 757, 698, 669, 640, 574, 545, 515. HR-MS(DART+):  $m/z$  calcd. for  $\text{C}_{54}\text{H}_{81}\text{N}_4\text{SSi}_6$ : 985.4792; found: 985.4813. Elemental analysis (%) calcd. for  $\text{C}_{54}\text{H}_{80}\text{N}_4\text{SSi}_6$ : C 65.79, H 8.18, N 5.68, found: C 64.62, H 8.29, N 5.24. UV-Vis:  $\lambda_{\text{max, abs}}$  (hexane) = 530 nm. Fluorescence:  $\lambda_{\text{max, em}}$  (hexane) = 541 nm.

## SUPPORTING INFORMATION

**4,11-Bis((triisopropylsilyl)ethynyl)-6,7,8,9-tetrakis((trimethylsilyl)ethynyl)-[1,2,5]thiadiazolo[3,4-b]phenazine 3a**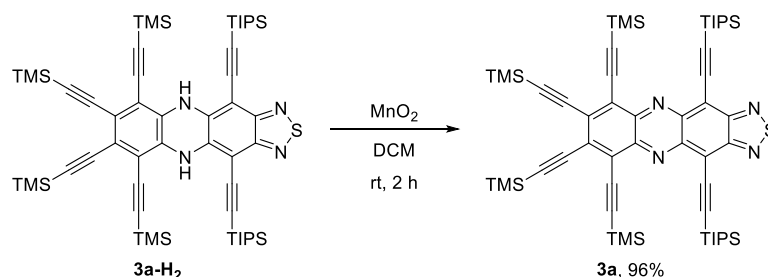

**GP1** was applied to **3a-H<sub>2</sub>** (300 mg, 304  $\mu\text{mol}$ , 1 equiv.) and  $\text{MnO}_2$  (265 mg, 3.04 mmol, 10 equiv.) in 20.0 mL DCM. The reaction mixture quickly turned from red to green. After 2 h at room temperature the reaction was worked up. Chromatography on silica using PE / DCM 10:1  $\rightarrow$  5:1  $\rightarrow$  3:1 as eluent gave the product as a green solid (287 mg, 292  $\mu\text{mol}$ , 96%). M.p.: 265 °C.  $^1\text{H}$  NMR (600 MHz,  $\text{CDCl}_3$ ):  $\delta$  [ppm] = 1.29-1.25 (m, 42H), 0.39 (s, 18H), 0.38 (s, 18H).  $^{13}\text{C}$  { $^1\text{H}$ } NMR (150 MHz,  $\text{CDCl}_3$ ):  $\delta$  [ppm] = 156.4, 143.5, 141.3, 132.1, 126.8, 115.2, 113.7, 110.5, 102.6, 102.3, 100.6, 19.2, 11.8, 0.6, 0.3. IR (neat):  $\nu$  [ $\text{cm}^{-1}$ ] = 2942, 2863, 1737, 1449, 1381, 1364, 1246, 1198, 1109, 1040, 937, 916, 837, 757, 700, 675, 641, 575, 405. HR-MS(DART+):  $m/z$  calcd. for  $\text{C}_{54}\text{H}_{79}\text{N}_4\text{SSi}_6$ : 983.4636; found: 983.4624. UV-Vis:  $\lambda_{\text{max, abs}}$  (hexane) = 693 nm. Fluorescence:  $\lambda_{\text{max, em}}$  (hexane) = 711 nm.

**6,7,8,9-Tetrakis(3,3-dimethylbut-1-yn-1-yl)-4,11-bis((triisopropylsilyl)ethynyl)-5,10-dihydro-[1,2,5]thiadiazolo[3,4-b]phenazine 3b-H<sub>2</sub>**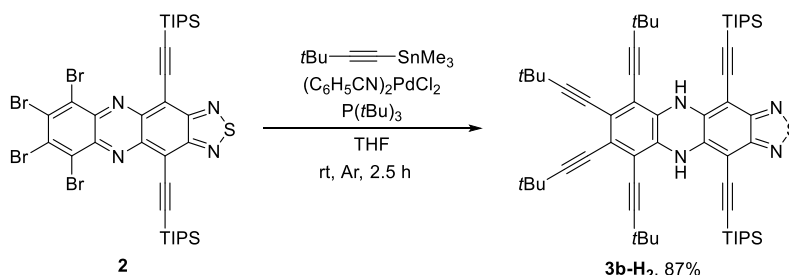

Bis(benzonitrile)palladium(II) dichloride (16.8 mg, 43.7  $\mu\text{mol}$ , 0.1 equiv.) was placed in a Schlenk tube and transferred into a glove-box under nitrogen atmosphere. 10.0 mL abs. THF were added followed by  $\text{P}(\text{t-Bu})_3$  (17.7 mg, 87.5  $\mu\text{mol}$ , 0.2 equiv.). The Schlenk tube was closed and taken outside the glove-box. Then, against a counter-flow of argon, **2** (400 mg, 437  $\mu\text{mol}$ , 1 equiv.) and (3,3-dimethylbut-1-yn-1-yl)trimethylstannane (1.29 g, 5.25 mmol, 12 equiv.) were added and the reaction mixture stirred at room temperature for 2.5 h. After adding DI water, extraction with DCM and drying of the organic phases over magnesium sulfate, the crude solution was filtered through a pad of silica. The solvent was evaporated under reduced pressure and the crude product was purified by chromatography on silica using PE / DCM 9:1  $\rightarrow$  6:1  $\rightarrow$  4:1 as eluent to give the product as a red solid (349 mg, 378  $\mu\text{mol}$ , 87%). M.p.: 298 °C decomp.  $^1\text{H}$  NMR (600 MHz,  $\text{CDCl}_3$ ):  $\delta$  [ppm] = 7.15 (s, 2H), 1.41 (s, 18H), 1.37 (s, 18H), 1.19-1.17 (m, 42H).  $^{13}\text{C}$  { $^1\text{H}$ } NMR (150 MHz,  $\text{CDCl}_3$ ):  $\delta$  [ppm] = 153.4, 136.7, 128.1, 122.7, 110.2, 109.3, 106.3, 104.7, 99.0, 93.5, 72.4, 31.6, 31.5, 28.7, 28.6, 19.0, 11.8. IR (neat):  $\nu$  [ $\text{cm}^{-1}$ ] = 3356, 2965, 2942, 2863, 2215, 2127, 1561, 1453, 1379, 1359, 1317, 1277, 1239, 1202, 1000, 880, 834, 814, 769, 674, 643, 576, 548, 512, 464. HR-MS(DART+):  $m/z$  calcd. for  $\text{C}_{58}\text{H}_{81}\text{N}_4\text{SSi}_2$ : 921.5715; found: 921.5703. UV-Vis:  $\lambda_{\text{max, abs}}$  (hexane) = 528 nm. Fluorescence:  $\lambda_{\text{max, em}}$  (hexane) = 532 nm.

## SUPPORTING INFORMATION

**6,7,8,9-Tetrakis(3,3-dimethylbut-1-yn-1-yl)-4,11-bis((triisopropylsilyl)ethynyl)-[1,2,5]thiadiazolo[3,4-b]phenazine 3b**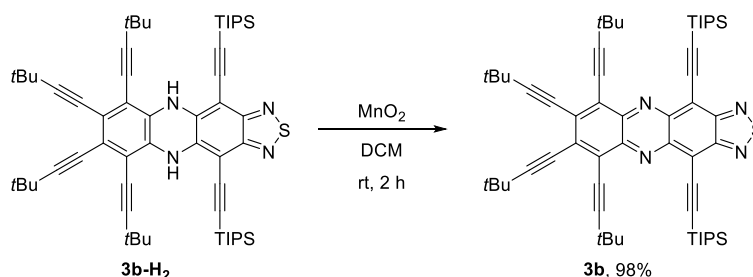

**GP1** was applied to **3b-H<sub>2</sub>** (500 mg, 543  $\mu$ mol, 1 equiv.) and MnO<sub>2</sub> (471 mg, 5.43 mmol, 10 equiv.) in 30.0 mL DCM. The reaction mixture quickly turned from red to green. After 2 h at room temperature the reaction was worked up. Chromatography on silica using PE / DCM 10:1  $\rightarrow$  5:1  $\rightarrow$  3:1 as eluent gave the product as a green solid (490 mg, 533  $\mu$ mol, 98%). M.p.: 273  $^{\circ}$ C. <sup>1</sup>H NMR (600 MHz, CDCl<sub>3</sub>):  $\delta$  [ppm] = 1.52 (s, 18H), 1.47 (s, 18H), 1.28-1.24 (m, 42H). <sup>13</sup>C {<sup>1</sup>H} NMR (150 MHz, CDCl<sub>3</sub>):  $\delta$  [ppm] = 156.5, 144.3, 141.1, 131.7, 125.8, 115.1, 112.9, 112.3, 112.0, 103.3, 78.8, 76.0, 31.5, 31.3, 29.1, 29.0, 19.1, 11.9. IR (neat):  $\nu$  [cm<sup>-1</sup>] = 2964, 2941, 2863, 2209, 1452, 1391, 1360, 1238, 1201, 1121, 1052, 1002, 90, 881, 780, 702, 674, 580, 443, 409. HR-MS(DART+): m/z calcd. for C<sub>58</sub>H<sub>79</sub>N<sub>4</sub>SSi<sub>2</sub>: 919.5558; found: 919.5539. UV-Vis:  $\lambda_{\text{max, abs}}$  (hexane) = 692 nm. Fluorescence:  $\lambda_{\text{max, em}}$  (hexane) = 700 nm.

**1,4-Bis((triisopropylsilyl)ethynyl)-6,7,8,9-tetrakis((trimethylsilyl)ethynyl)phenazine-2,3-diamine 4a**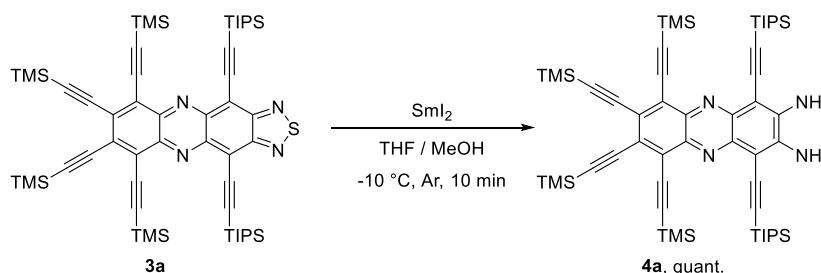

**GP2** was applied to **3a** (230 mg, 234  $\mu$ mol, 1 equiv.) and Sml<sub>2</sub> (28.1 mL, 2.81 mmol, 0.1 M in THF, 12 equiv.) in 10.0 mL abs. THF and 0.25 mL abs. MeOH. After workup the crude product was purified by chromatography on silica using PE / EE 20:1  $\rightarrow$  10:1  $\rightarrow$  5:1 as eluent to give the product as an orange solid (222 mg, 232  $\mu$ mol, quant.). M.p.: 236. <sup>1</sup>H NMR (600 MHz, CDCl<sub>3</sub>):  $\delta$  [ppm] = 5.06 (s, 4H), 1.22-1.19 (m, 42H), 0.36 (s, 18H), 0.34 (s, 18H). <sup>13</sup>C {<sup>1</sup>H} NMR (150 MHz, CDCl<sub>3</sub>):  $\delta$  [ppm] = 145.4, 140.9, 140.4, 129.2, 126.0, 108.0, 105.8, 104.6, 102.7, 102.6, 101.6, 101.2, 19.1, 11.7, 0.7, 0.5. IR (neat):  $\nu$  [cm<sup>-1</sup>] = 3459, 3369, 2940, 2863, 2242, 2130, 1646, 1529, 1442, 1385, 1317, 882, 756, 662. HR-MS(DART+): m/z calcd. for C<sub>54</sub>H<sub>79</sub>N<sub>4</sub>SSi<sub>6</sub>: 955.5228; found: 955.5235.

**6,7,8,9-Tetrakis(3,3-dimethylbut-1-yn-1-yl)-1,4-bis((triisopropylsilyl)ethynyl)phenazine-2,3-diamine 4b**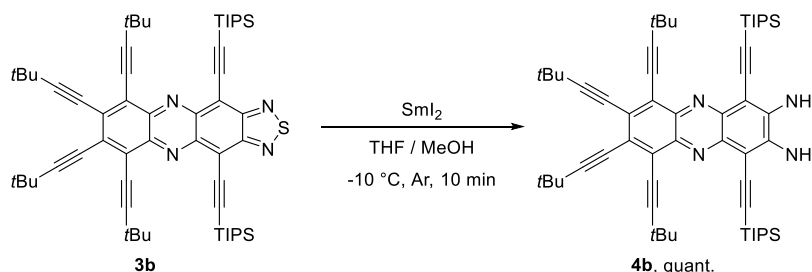

**GP2** was applied to **3b** (240 mg, 261  $\mu$ mol, 1 equiv.) and Sml<sub>2</sub> (31.3 mL, 3.13 mmol, 0.1 M in THF, 12 equiv.) in 10.0 mL abs. THF and 0.25 mL abs. MeOH. After workup the crude product was purified by chromatography on silica using PE / EE 20:1  $\rightarrow$  10:1 as eluent to give the product as an orange solid (231 mg, 259  $\mu$ mol, quant.). M.p.: 249  $^{\circ}$ C. <sup>1</sup>H NMR (600 MHz, CDCl<sub>3</sub>):  $\delta$  [ppm] = 4.96 (s, 4H), 1.49 (s, 18H), 1.45 (s, 18H), 1.21-1.18 (m, 42H). <sup>13</sup>C {<sup>1</sup>H} NMR 150 MHz, CDCl<sub>3</sub>):  $\delta$  [ppm] = 145.2, 140.8, 140.2, 128.7, 125.2, 109.8, 107.9, 104.1, 103.2, 102.1, 78.5, 76.5, 31.6, 31.5, 28.9, 28.8, 19.1, 11.8. IR (neat):  $\nu$  [cm<sup>-1</sup>] = 3455, 3368, 2965, 2863, 2219, 2124, 1624,

## SUPPORTING INFORMATION

1538, 1504, 1448, 1412, 1360, 1244, 1202, 1133, 1102, 995, 970, 882, 803, 675, 580, 445, 425. HR-MS(DART+): m/z calcd. for  $C_{58}H_{83}N_4Si_2$ : 891.6151; found: 891.6143.

**1,2,3,4-Tetrabromo-6,13-bis((triisopropylsilyl)ethynyl)-8,9,10,11-tetrakis((trimethylsilyl)ethynyl)-quinoxalino[2,3-b]phenazine**  
**7a**

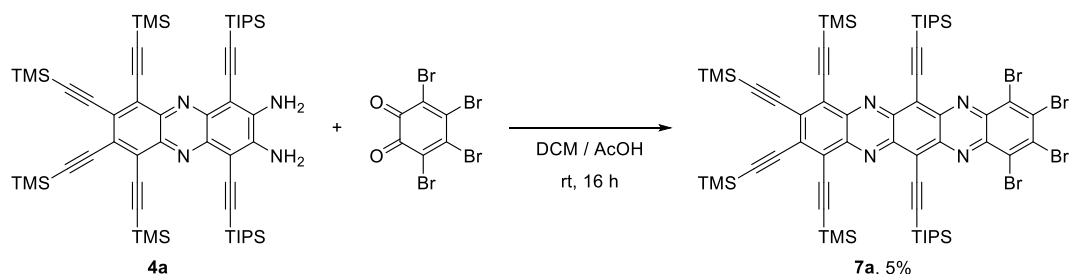

**4a** (56.0 mg, 58.6  $\mu\text{mol}$ , 1 equiv.) and tetrabromoorthoquinone (49.7 mg, 117  $\mu\text{mol}$ , 2 equiv.) were stirred for 16 h in 4.00 mL of DCM / AcOH (1:1) at room temperature. The mixture was poured into DI water and extracted with DCM. The organic phases were treated with sat. aqueous sodium bicarbonate and dried over magnesium sulfate. After evaporation of the solvent under reduced pressure, the crude product was purified by chromatography on silica using PE / DCM 20:1  $\rightarrow$  10:1  $\rightarrow$  5:1 as eluent to give the product as a brown solid (4.00 mg, 2.98  $\mu\text{mol}$ , 5%).  $^1\text{H}$  NMR (600 MHz,  $\text{CDCl}_3$ ):  $\delta$  [ppm] = 1.30-1.26 (m, 42H), 0.38 (s, 18H), 0.38 (s, 18H).  $^{13}\text{C}$   $\{^1\text{H}\}$  NMR (150 MHz,  $\text{CDCl}_3$ ):  $\delta$  [ppm] = 143.7, 143.6, 142.9, 141.3, 133.0, 132.6, 129.1, 126.8, 123.5, 116.3, 111.0, 111.0, 102.8, 102.4, 100.9, 19.3, 12.0, 0.6, 0.3. IR (neat):  $\nu$  [ $\text{cm}^{-1}$ ] = 3460 3369, 2959, 2942, 2864, 2359, 2340, 2145, 1647, 1625, 1455, 1247, 1128, 1025, 935, 844, 759, 678, 580. HR-MS(MALDI+): m/z calcd. for  $C_{54}H_{79}N_4SSi_6$ : 1339.1648; found: 1339.1693. UV-Vis:  $\lambda_{\text{max}}$  (hexane) = 769 nm.

## SUPPORTING INFORMATION

## Optical Spectroscopy

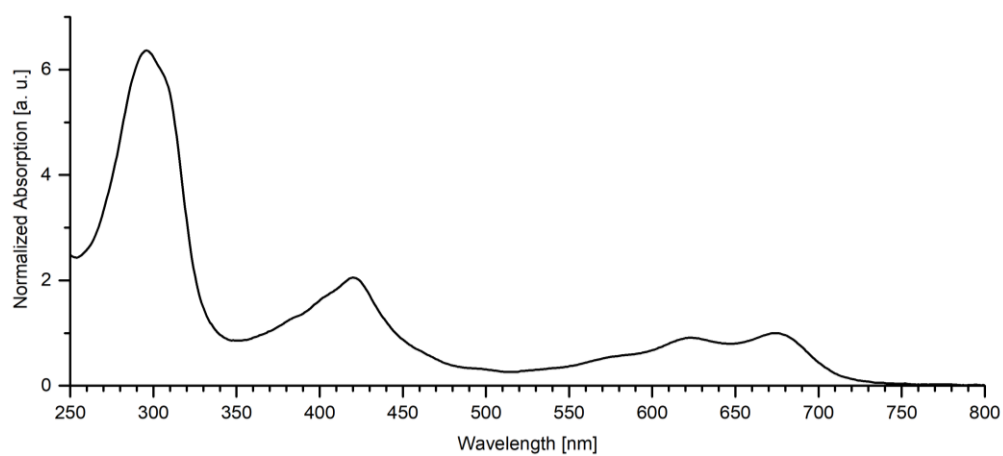

Figure S1. Normalized Absorption Spectrum of 2.

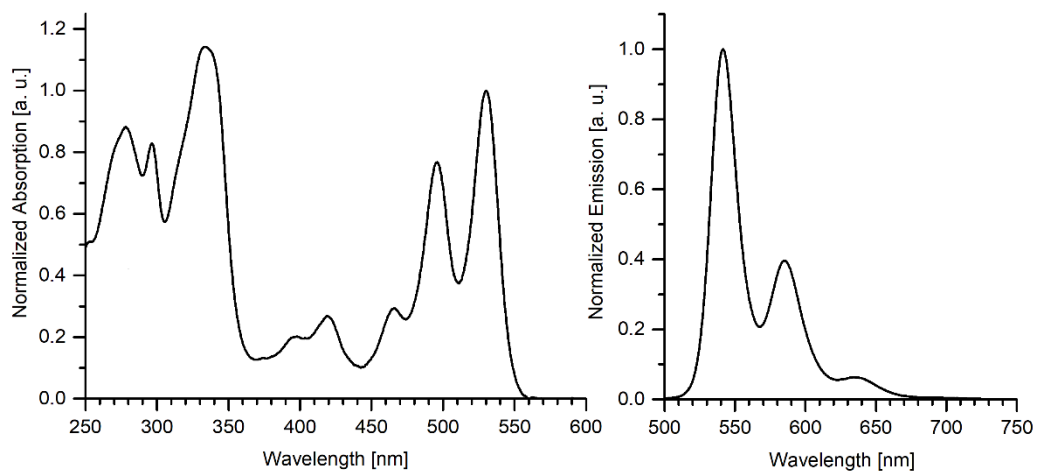

Figure S2. Normalized Absorption (left) and Emission (right) Spectra of 3a-H<sub>2</sub>.

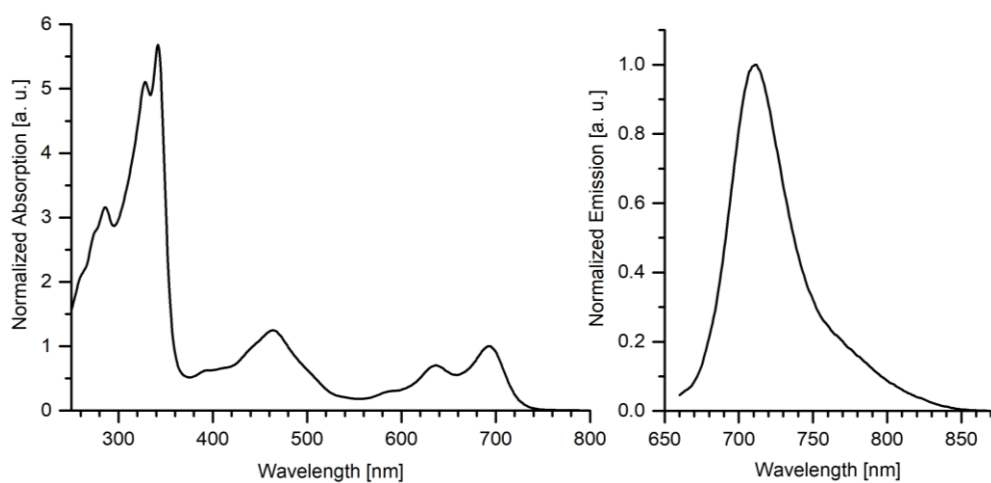

Figure S3. Normalized Absorption (left) and Emission (right) Spectra of 3a.

## SUPPORTING INFORMATION

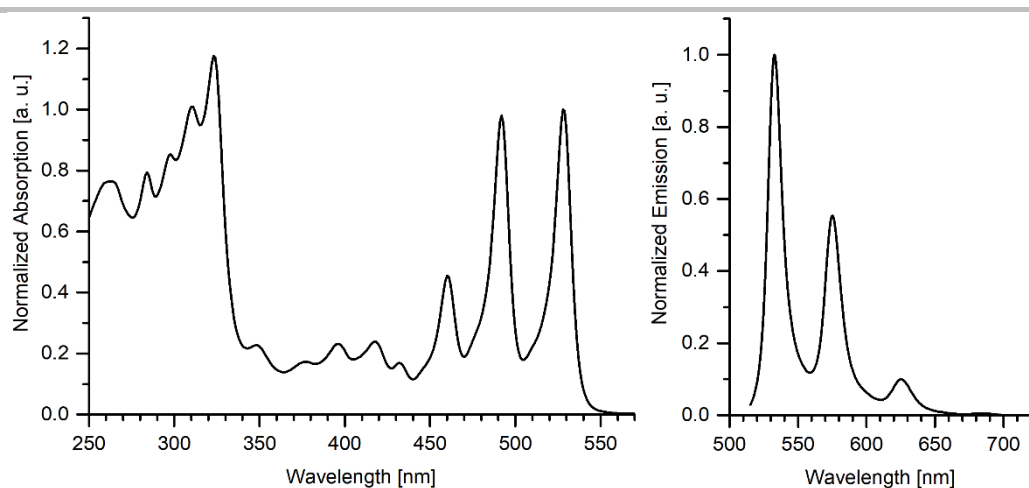

Figure S4. Normalized Absorption (left) and Emission (right) Spectra of **3b-H<sub>2</sub>**.

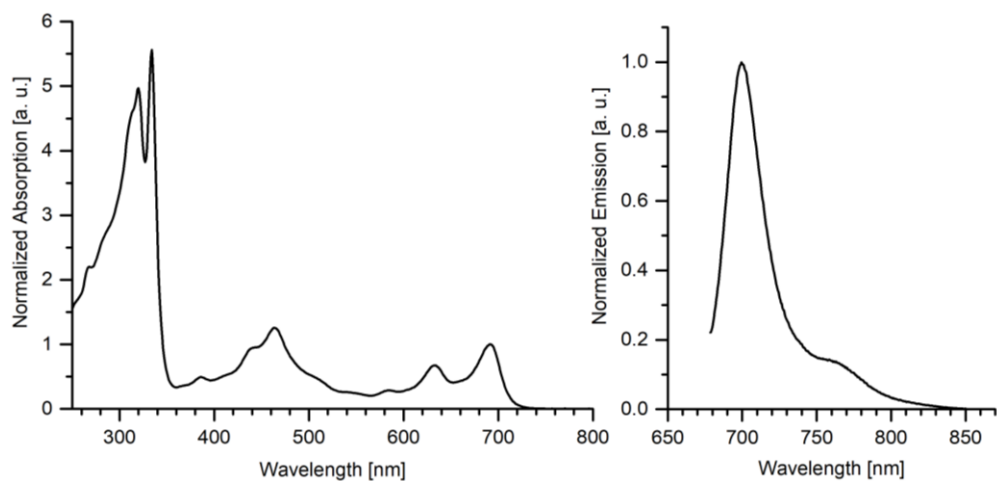

Figure S5. Normalized Absorption (left) and Emission (right) Spectra of **3b**.

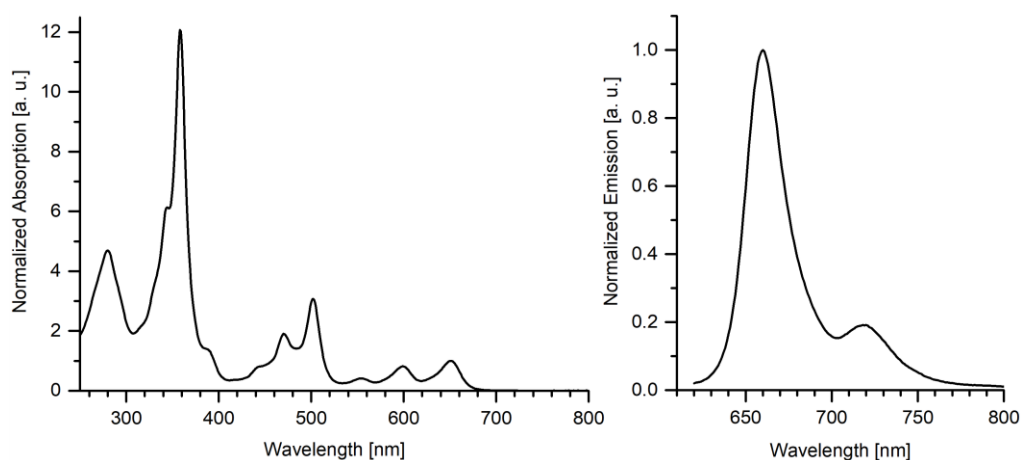

Figure S6. Normalized Absorption (left) and Emission (right) Spectra of **6**.



## SUPPORTING INFORMATION

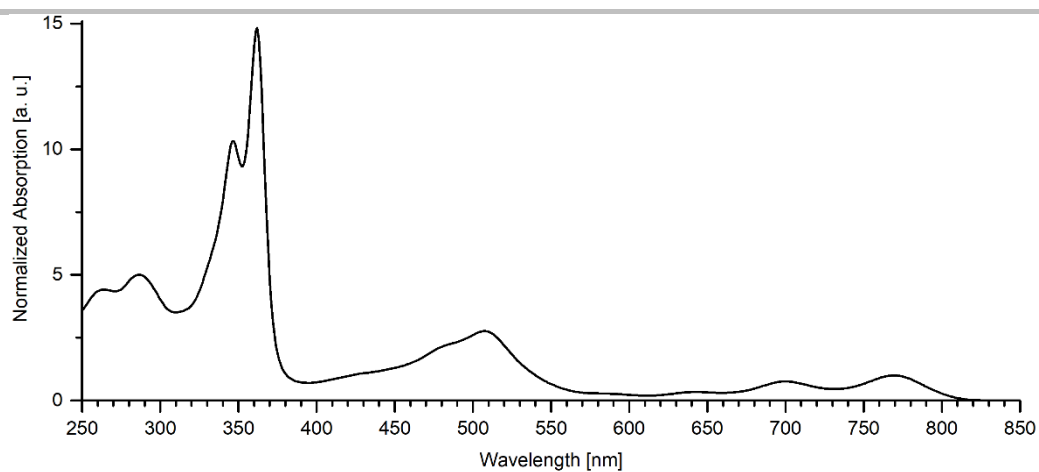

Figure S7. Normalized Absorption Spectrum of 7a.

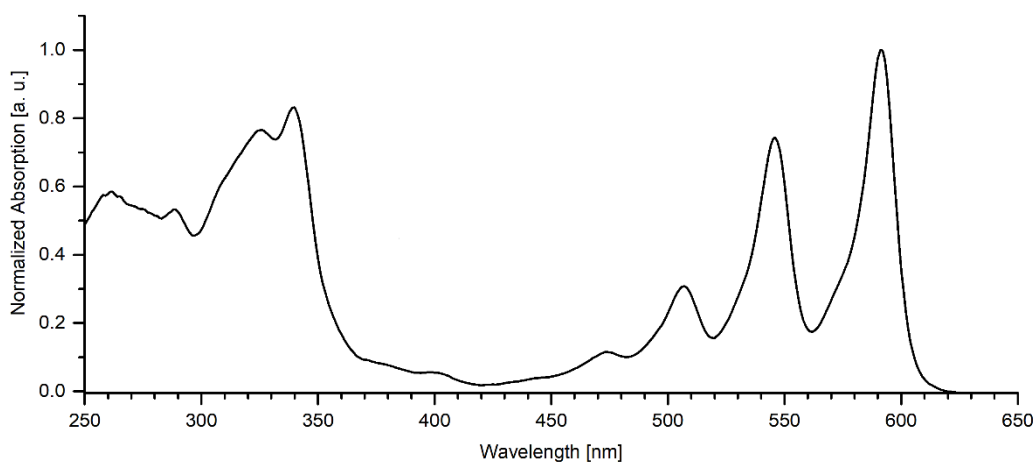

Figure S8. Normalized Absorption Spectrum of 7b-H<sub>2</sub>.

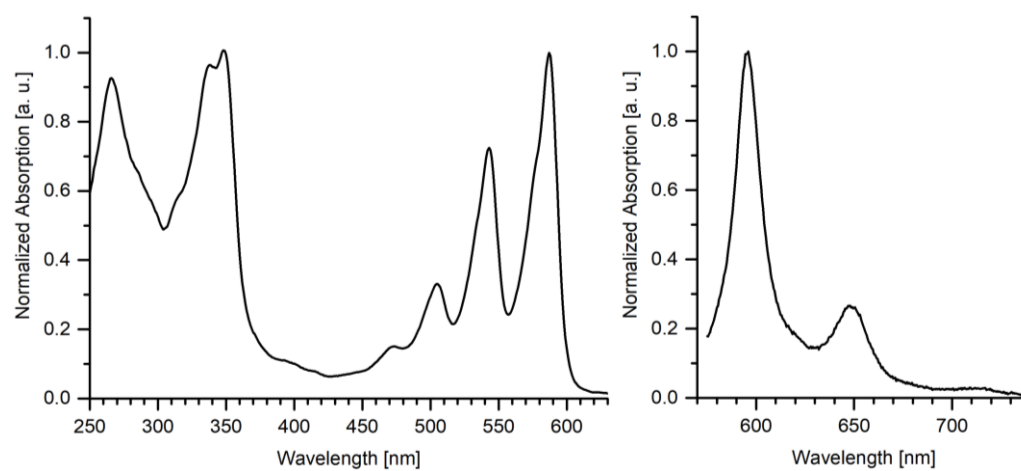

Figure S9. Normalized Absorption (left) and Emission (right) Spectra of 8-H<sub>2</sub>.

## SUPPORTING INFORMATION

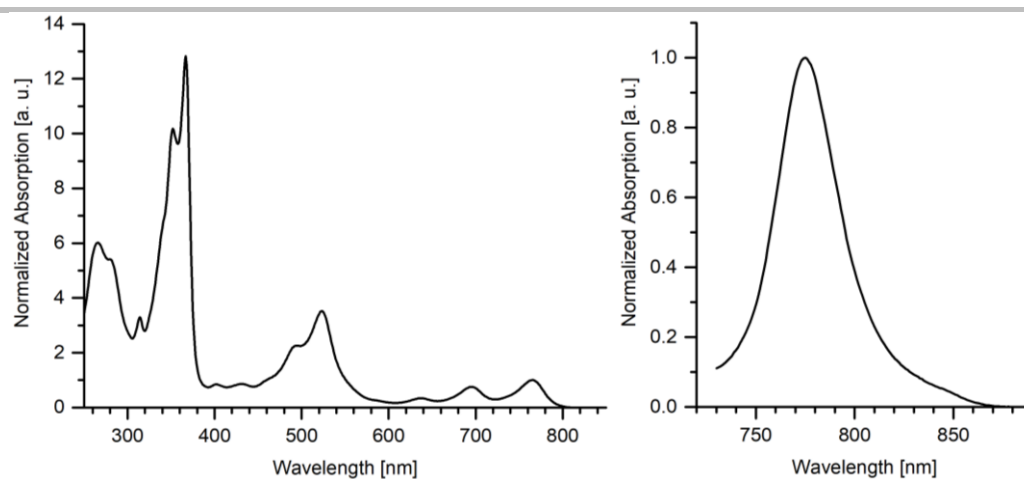

**Figure S10.** Normalized Absorption (left) and Emission (right) Spectra of **8**.

## SUPPORTING INFORMATION

## Cyclic Voltammetry

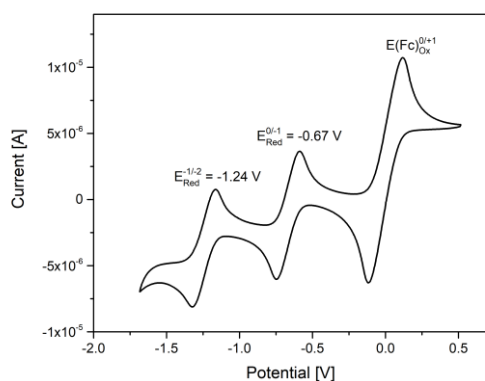

Figure S11. Cyclic voltammogram of 2.

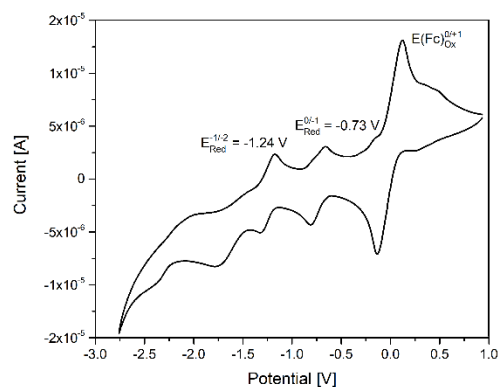

Figure S12. Cyclic voltammogram of 3a.

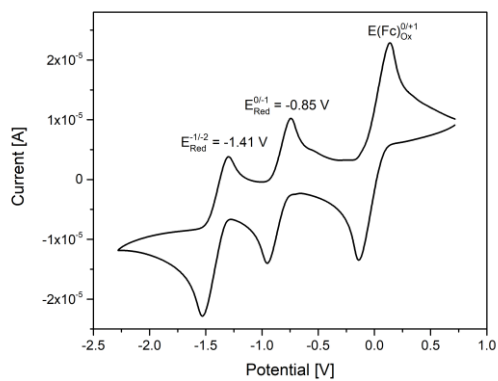

Figure S13. Cyclic voltammogram of 3b.

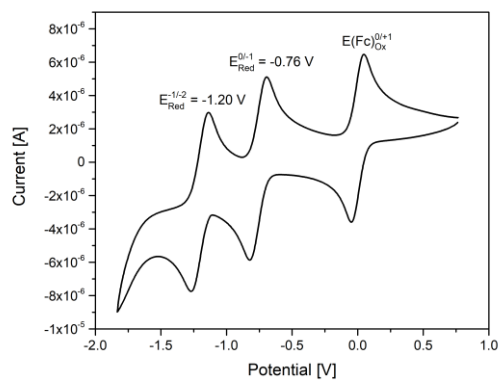

Figure S14. Cyclic voltammogram of 6.

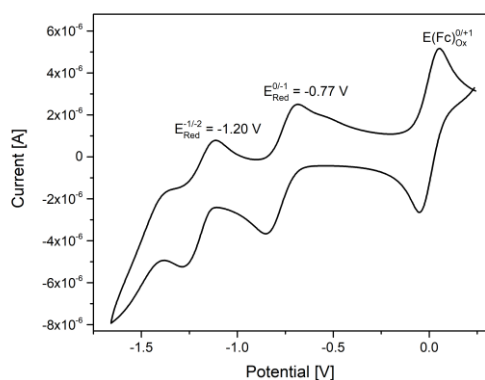

Figure S15. Cyclic voltammogram of 8.

## SUPPORTING INFORMATION

## Calculations

|      | 2                                                                                             | 3a                                                                                            | 3b                                                                                            | 6                                                                                              | 8                                                                                               |
|------|-----------------------------------------------------------------------------------------------|-----------------------------------------------------------------------------------------------|-----------------------------------------------------------------------------------------------|------------------------------------------------------------------------------------------------|-------------------------------------------------------------------------------------------------|
| LUMO | 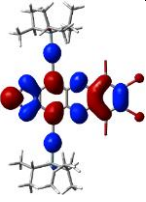<br>-4.19 eV | <br>-3.94 eV | <br>-3.75 eV | <br>-3.72 eV | <br>-3.68 eV |
| HOMO | <br>-5.97 eV | <br>-5.65 eV | <br>-5.45 eV | <br>-5.57 eV | <br>-5.21 eV |
| Gap  | 1.78 eV                                                                                       | 1.71 eV                                                                                       | 1.70 eV                                                                                       | 1.85 eV                                                                                        | 1.53 eV                                                                                         |

Figure S16. Distribution of FMOs in 2, 3a, 3b, 6 and 8, calculated using TURBOMOLE B3LYP/def2TZVP//Gaussian 09 B3LYP/6-311++G\*\*.

## SUPPORTING INFORMATION

## NMR-Spectra

## 6,7,8,9-Tetrabromo-4,11-bis((triisopropylsilyl)ethynyl)-[1,2,5]thiadiazolo[3,4-b]phenazine 2

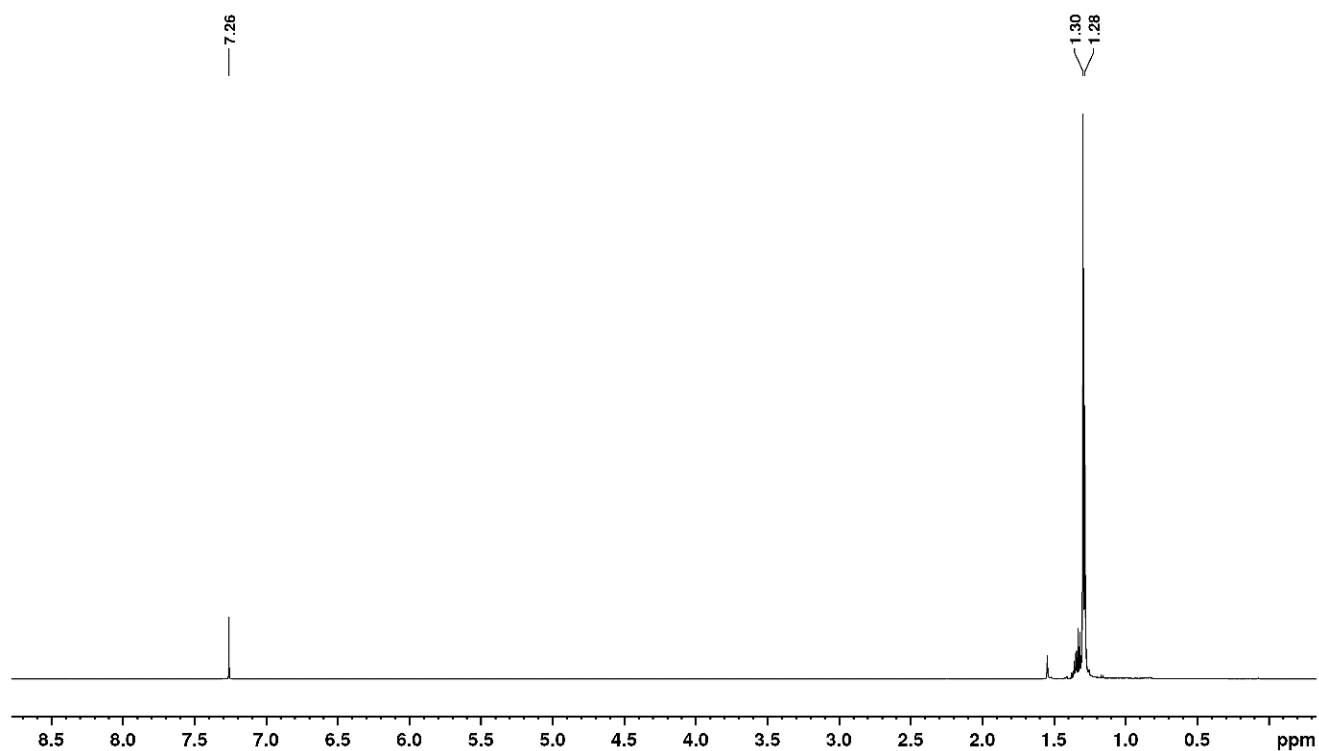Figure S17. <sup>1</sup>H NMR (500 MHz, CDCl<sub>3</sub>) of 2.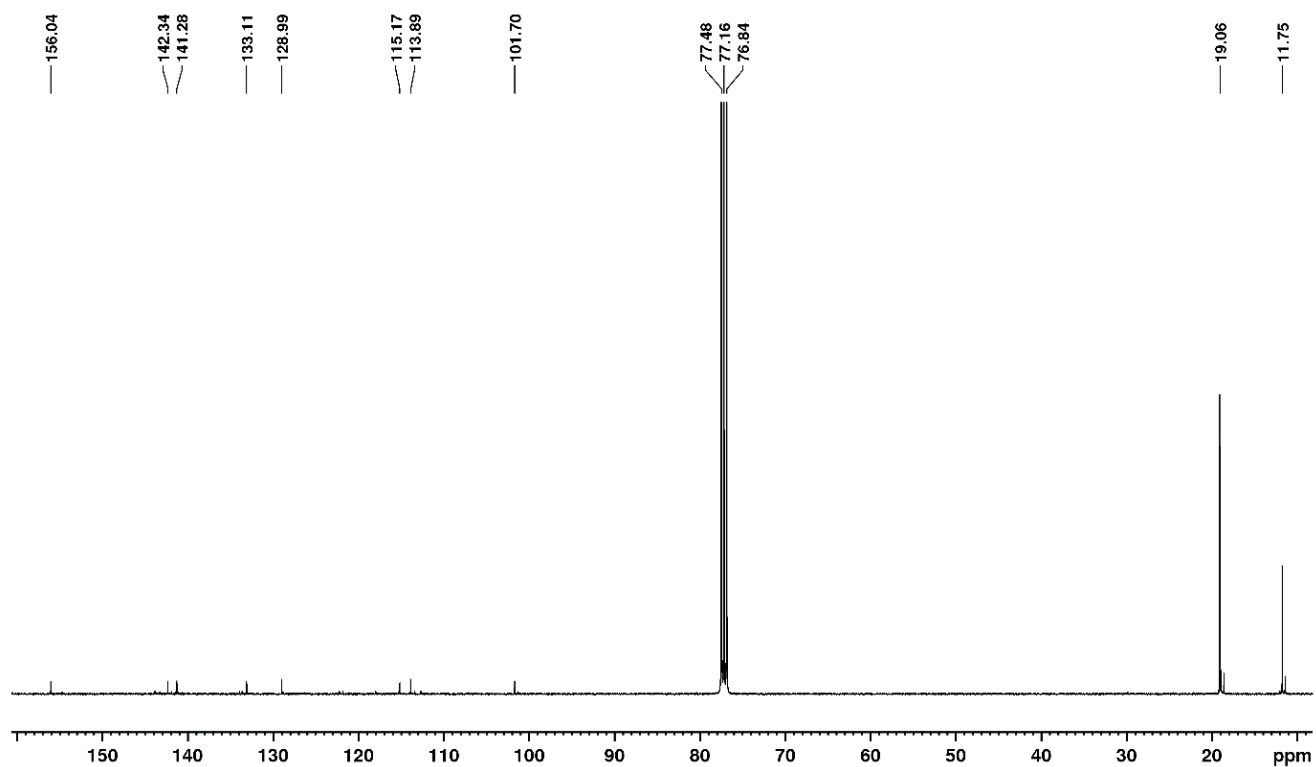Figure S18. <sup>13</sup>C {<sup>1</sup>H} NMR (100 MHz, CDCl<sub>3</sub>) of 2.

## SUPPORTING INFORMATION

4,11-bis((triisopropylsilyl)ethynyl)-6,7,8,9-tetrakis(trimethylsilyl)ethynyl)-5,10-dihydro-[1,2,5]thiadiazolo[3,4-b]phenazine 3-H<sub>2</sub>

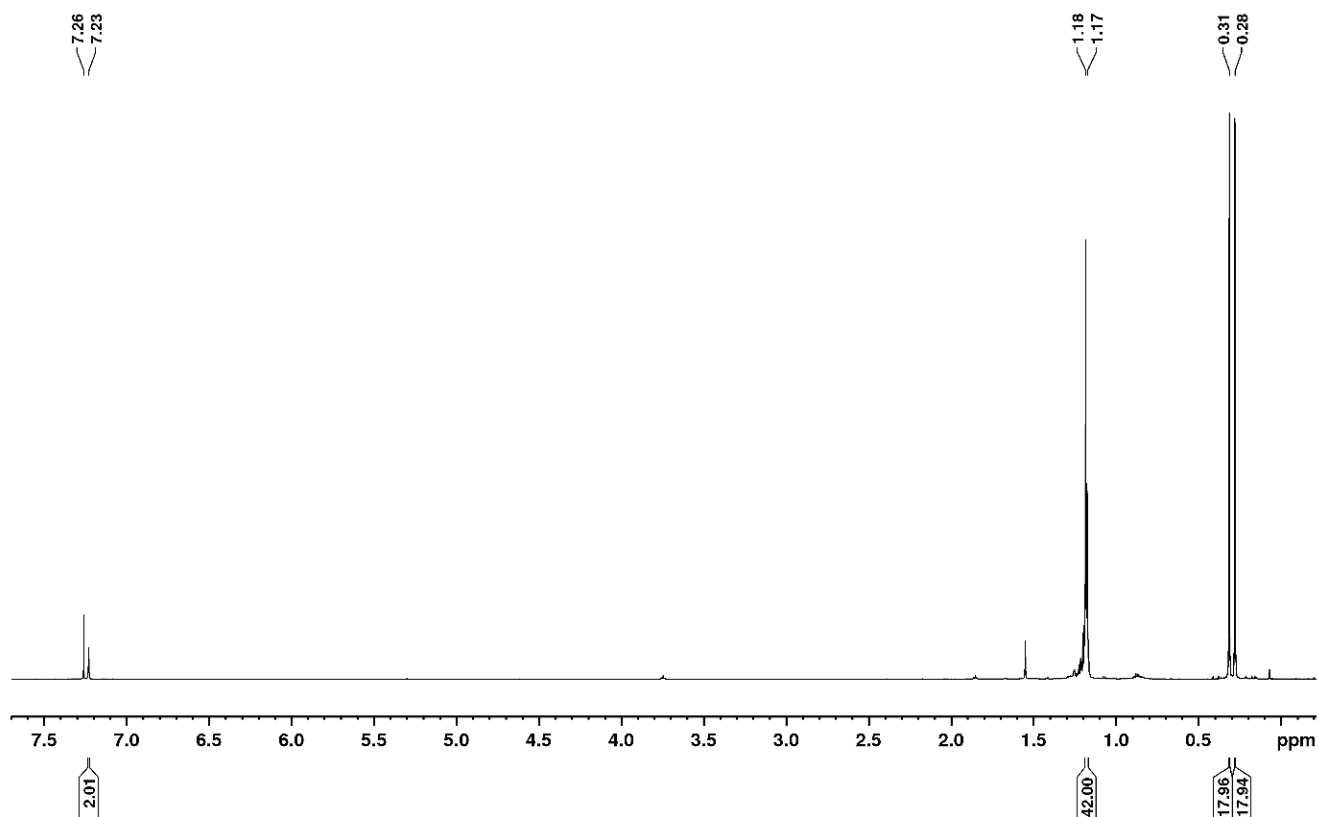

Figure S19. <sup>1</sup>H NMR (600 MHz, CDCl<sub>3</sub>) of 3a-H<sub>2</sub>.

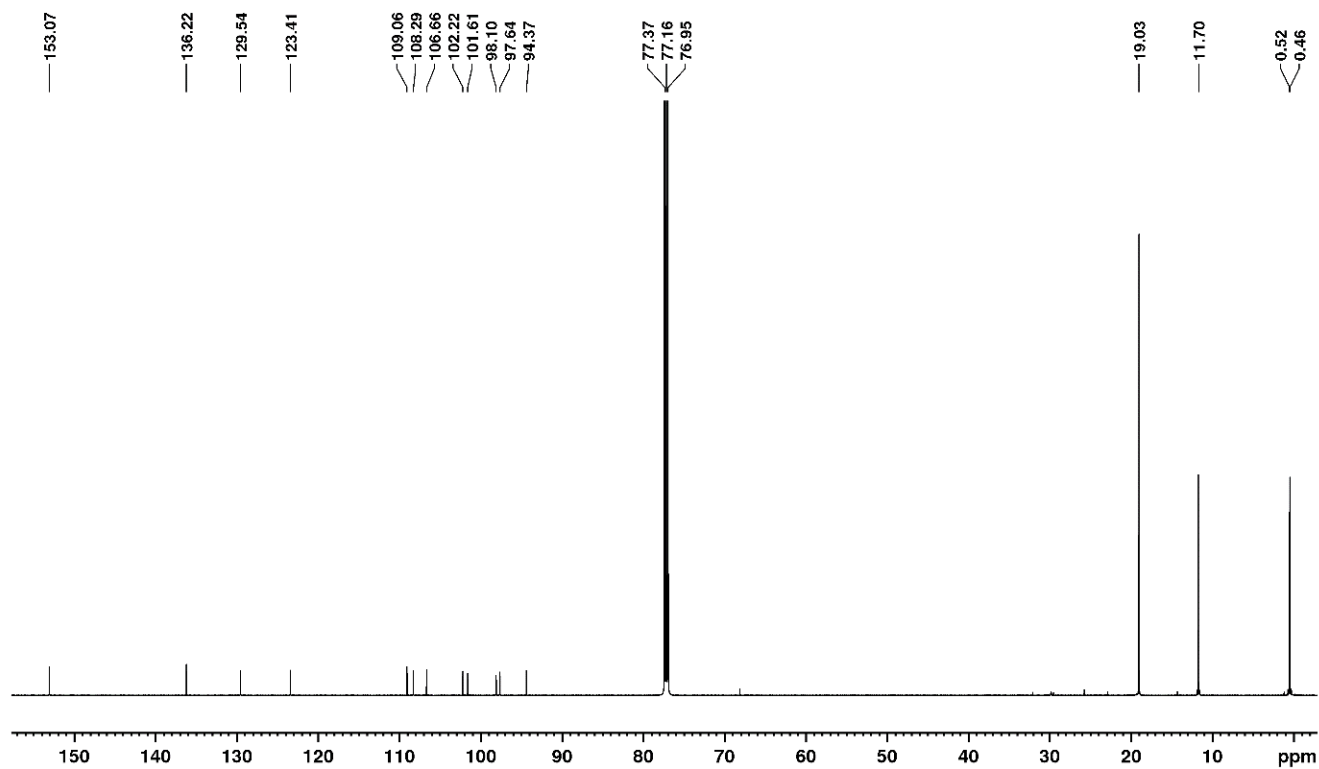

Figure S20. <sup>13</sup>C {<sup>1</sup>H} NMR (150 MHz, CDCl<sub>3</sub>) of 3a-H<sub>2</sub>.

## SUPPORTING INFORMATION

## 4,11-bis((triisopropylsilyl)ethynyl)-6,7,8,9-tetrakis((trimethylsilyl)ethynyl)-[1,2,5]thiadiazolo[3,4-b]phenazine 3a

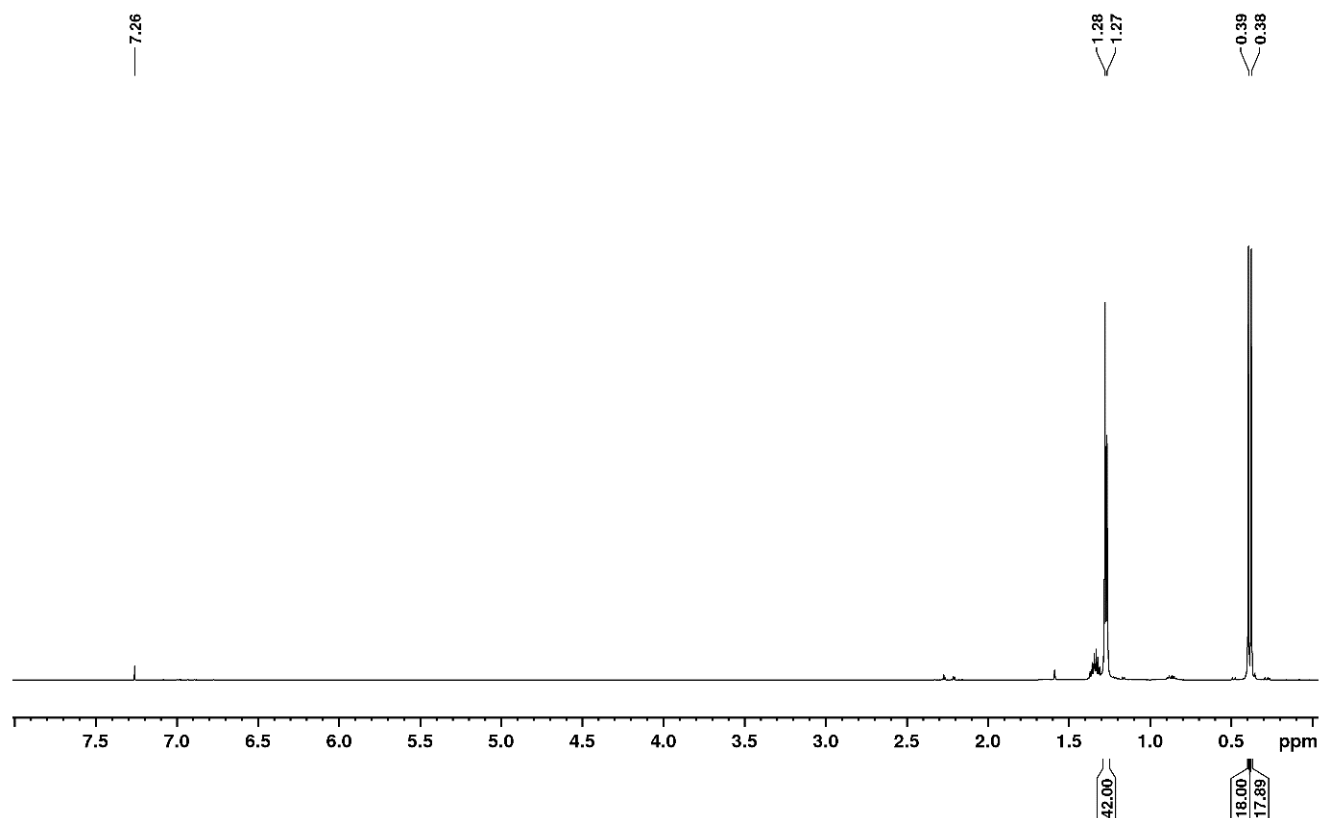Figure S21.  $^1\text{H}$  NMR (600 MHz,  $\text{CDCl}_3$ ) of 3a.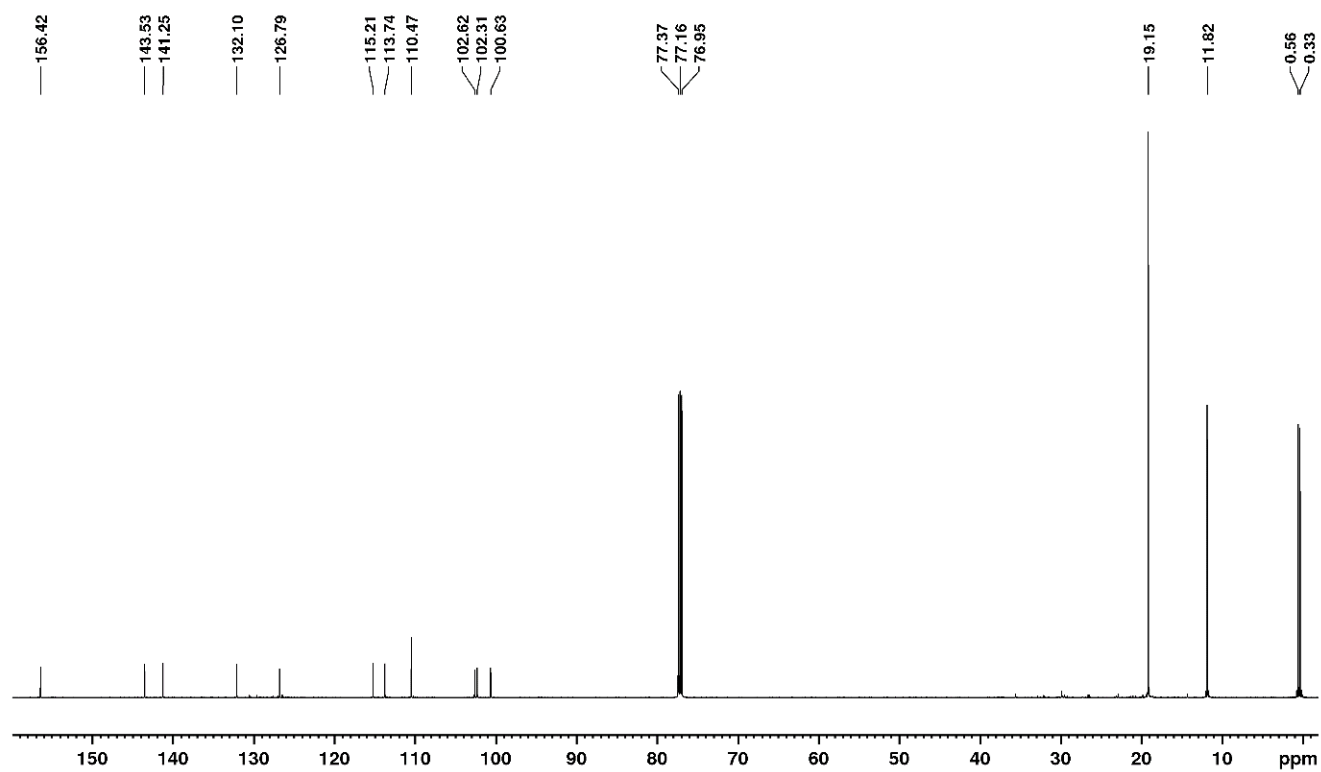Figure S22.  $^{13}\text{C}$   $\{^1\text{H}\}$  NMR (150 MHz,  $\text{CDCl}_3$ ) of 3a.

## SUPPORTING INFORMATION

6,7,8,9-tetrakis(3,3-dimethylbut-1-yn-1-yl)-4,11-bis((triisopropylsilyl)ethynyl)-5,10-dihydro-[1,2,5]thiadiazolo[3,4-b]phenazine  
3b-H<sub>2</sub>

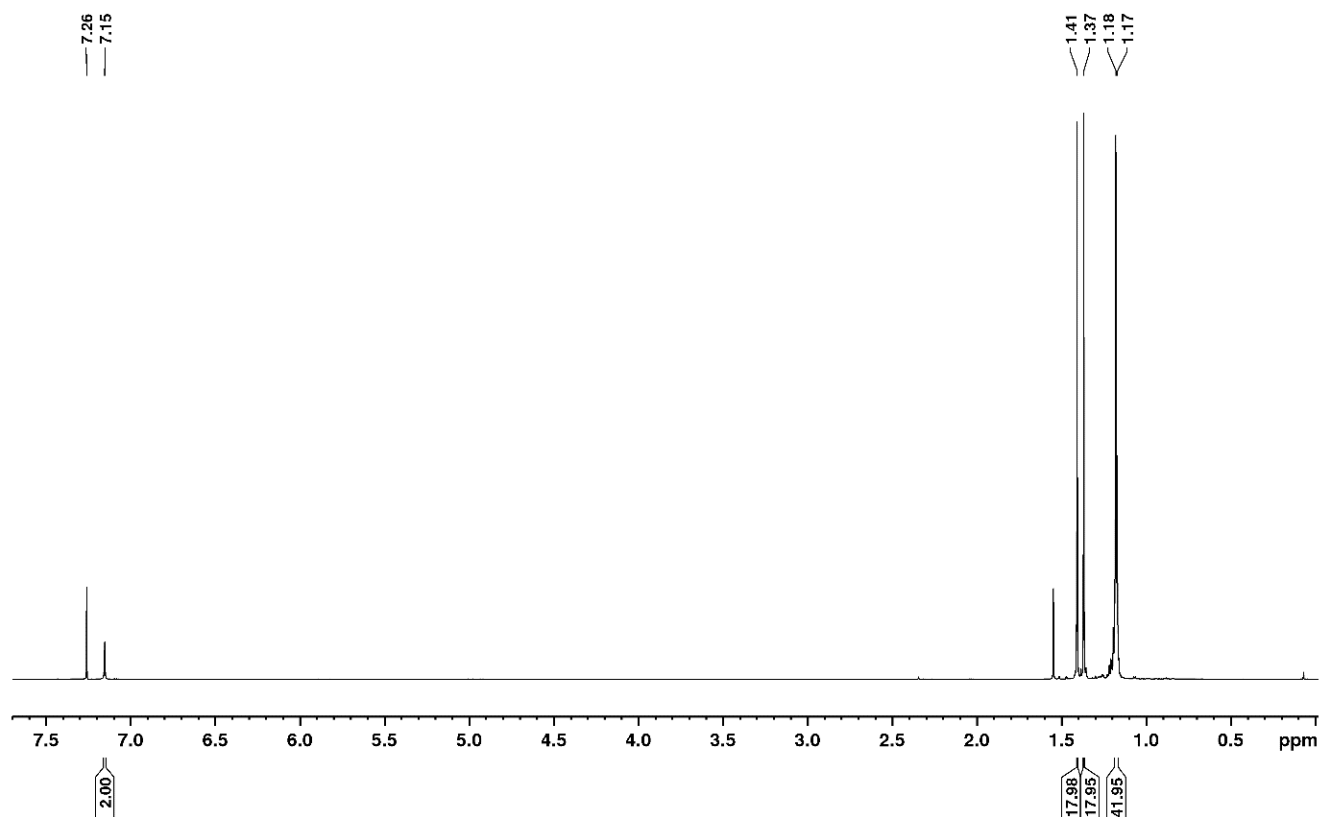

Figure S23. <sup>1</sup>H NMR (600 MHz, CDCl<sub>3</sub>) of 3b-H<sub>2</sub>.

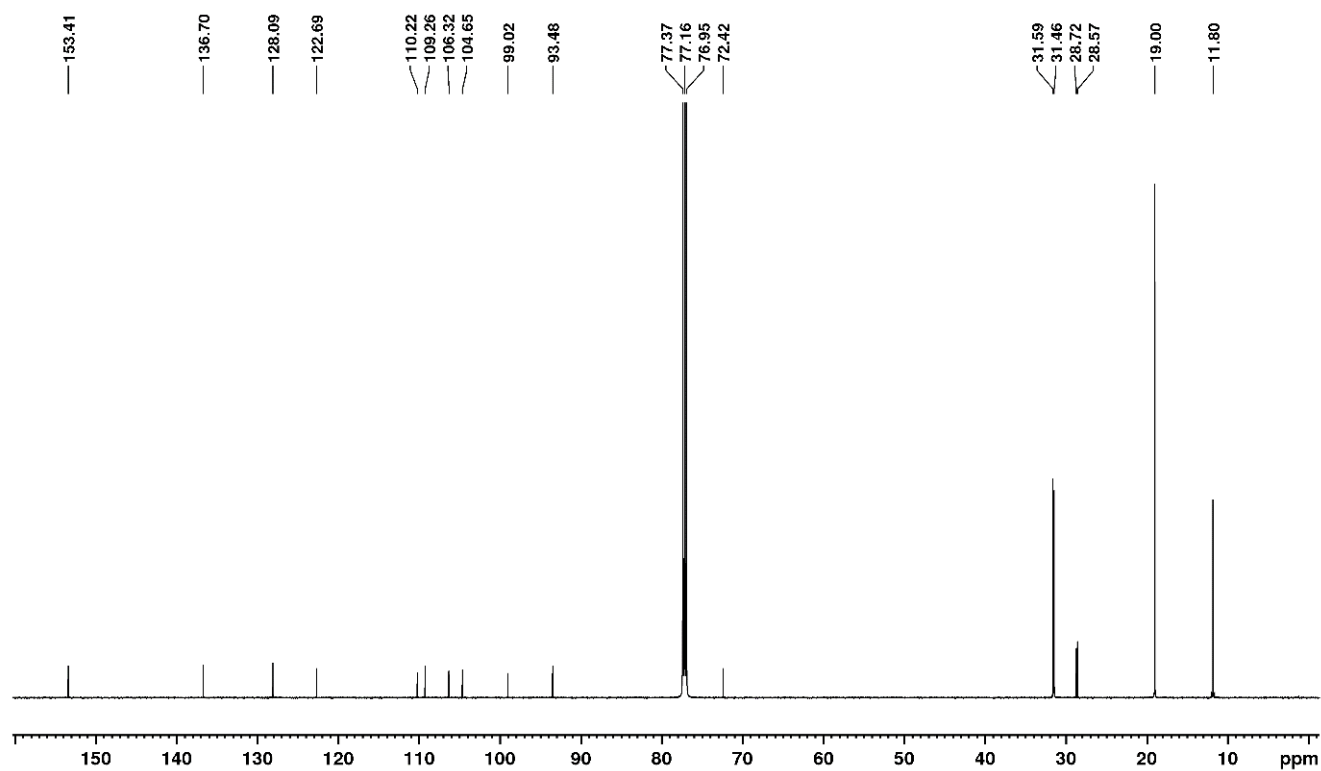

Figure S24. <sup>13</sup>C {<sup>1</sup>H} NMR (150 MHz, CDCl<sub>3</sub>) of 3b-H<sub>2</sub>.



## SUPPORTING INFORMATION

**6,7,8,9-tetrakis(3,3-dimethylbut-1-yn-1-yl)-4,11-bis((triisopropylsilyl)ethynyl)-[1,2,5]thiadiazolo[3,4-b]phenazine 3b**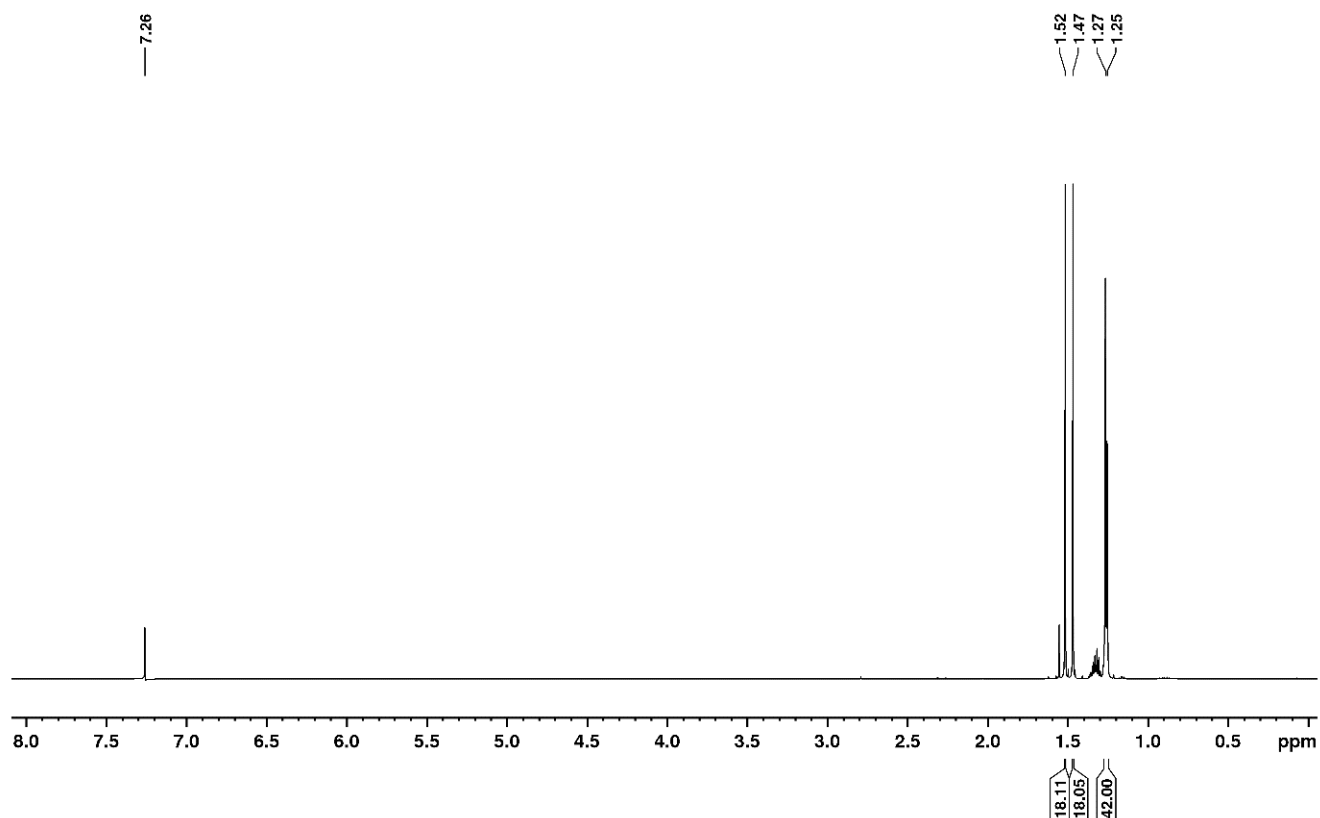Figure S25.  $^1\text{H}$  NMR (600 MHz,  $\text{CDCl}_3$ ) of **3b**.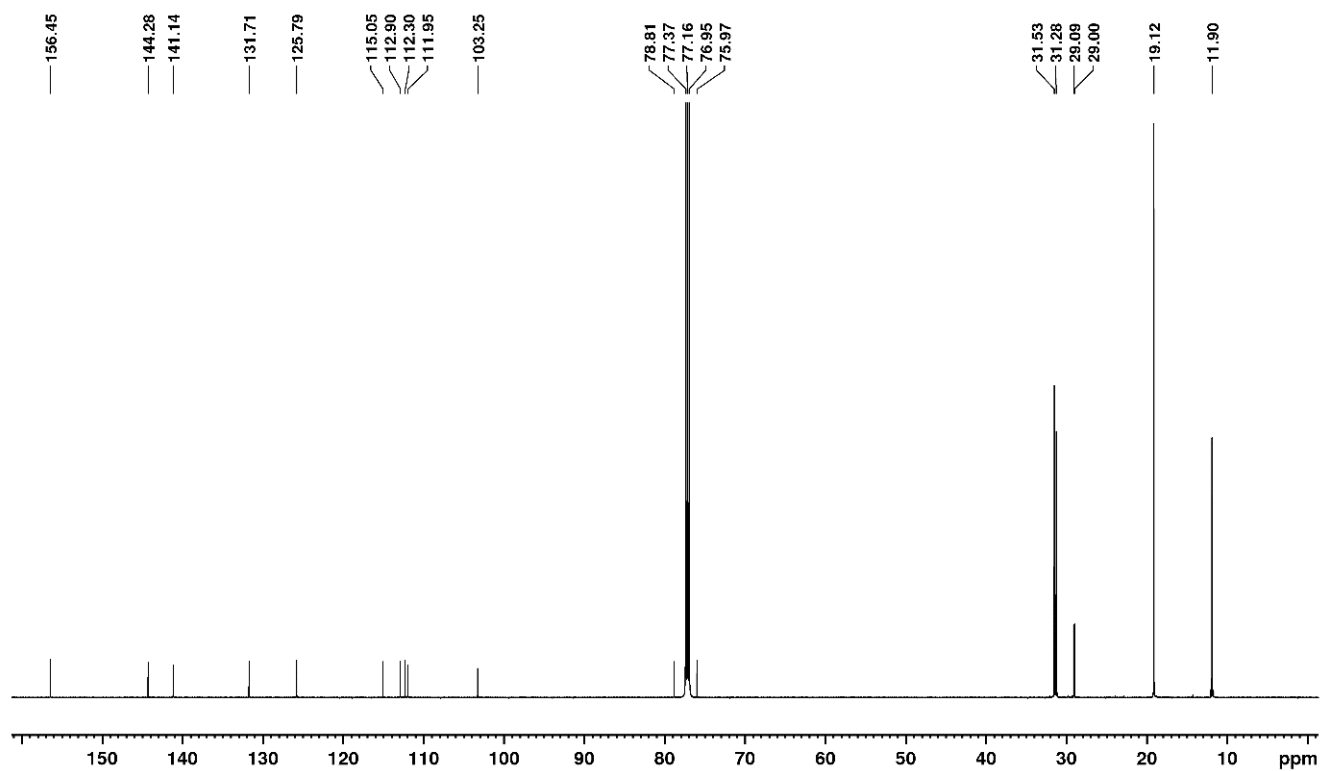Figure S26.  $^{13}\text{C}$   $\{^1\text{H}\}$  NMR (150 MHz,  $\text{CDCl}_3$ ) of **3b**.

## SUPPORTING INFORMATION

**1,4-bis((triisopropylsilyl)ethynyl)-6,7,8,9-tetrakis((trimethylsilyl)ethynyl)phenazine-2,3-diamine 4a**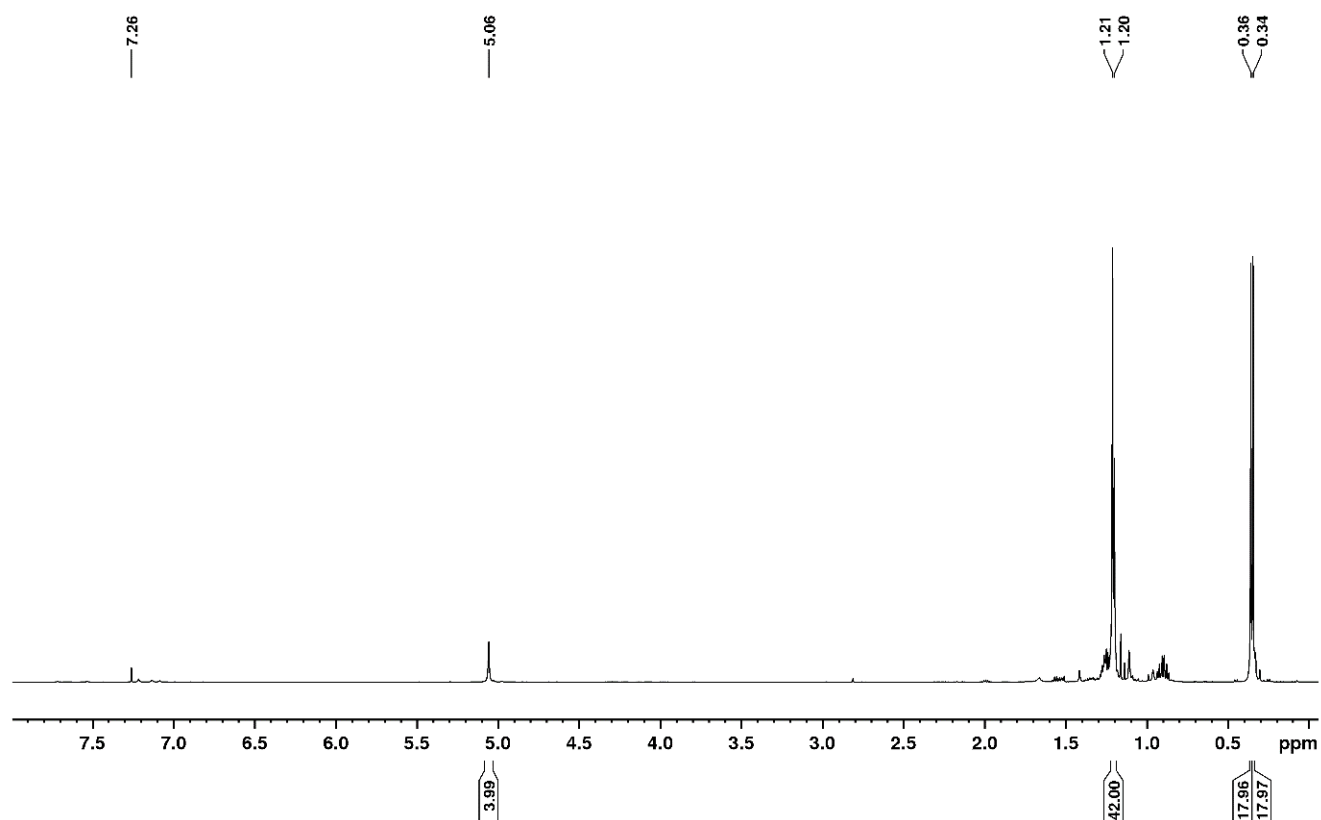Figure S27.  $^1\text{H}$  NMR (600 MHz,  $\text{CDCl}_3$ ) of **4a**.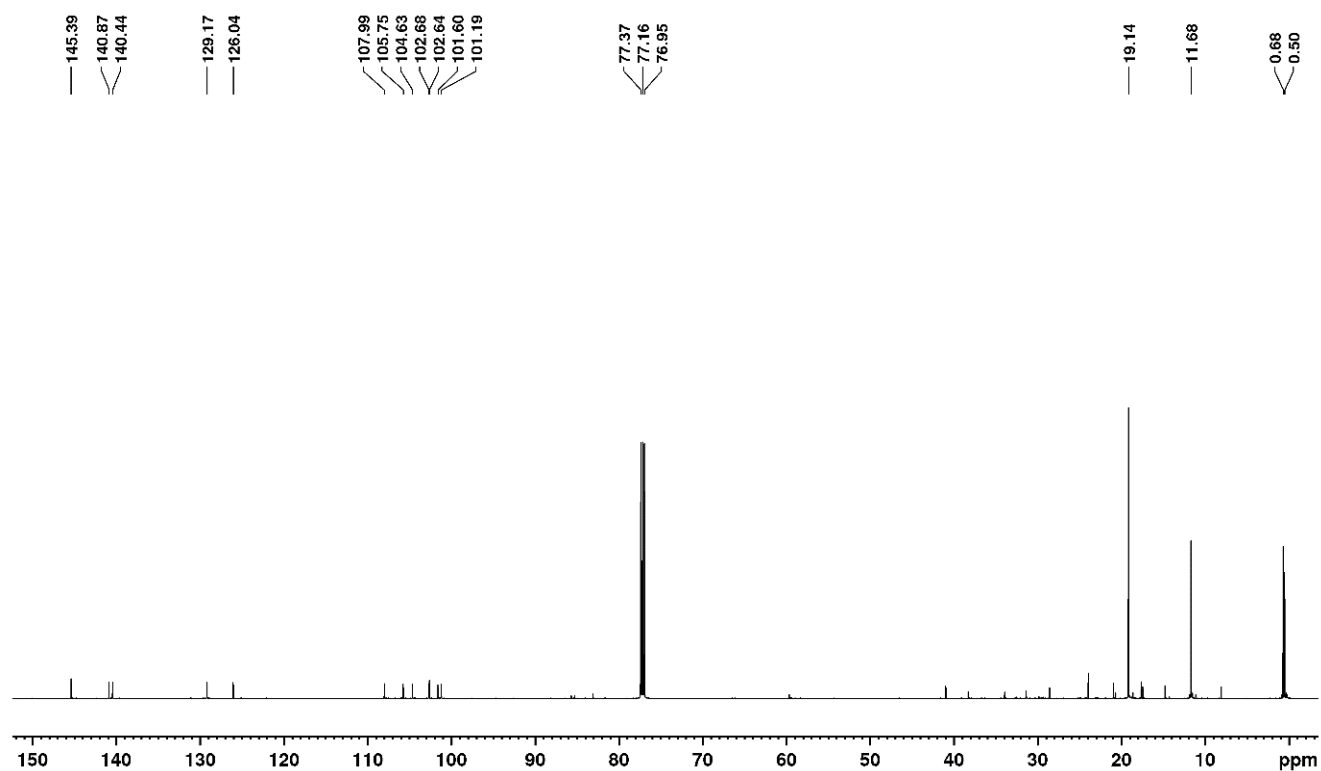Figure S28.  $^{13}\text{C}$   $\{^1\text{H}\}$  NMR (150 MHz,  $\text{CDCl}_3$ ) of **4a**.

## SUPPORTING INFORMATION

**6,7,8,9-tetrakis(3,3-dimethylbut-1-yn-1-yl)-1,4-bis((triisopropylsilyl)ethynyl)phenazine-2,3-diamine 4b**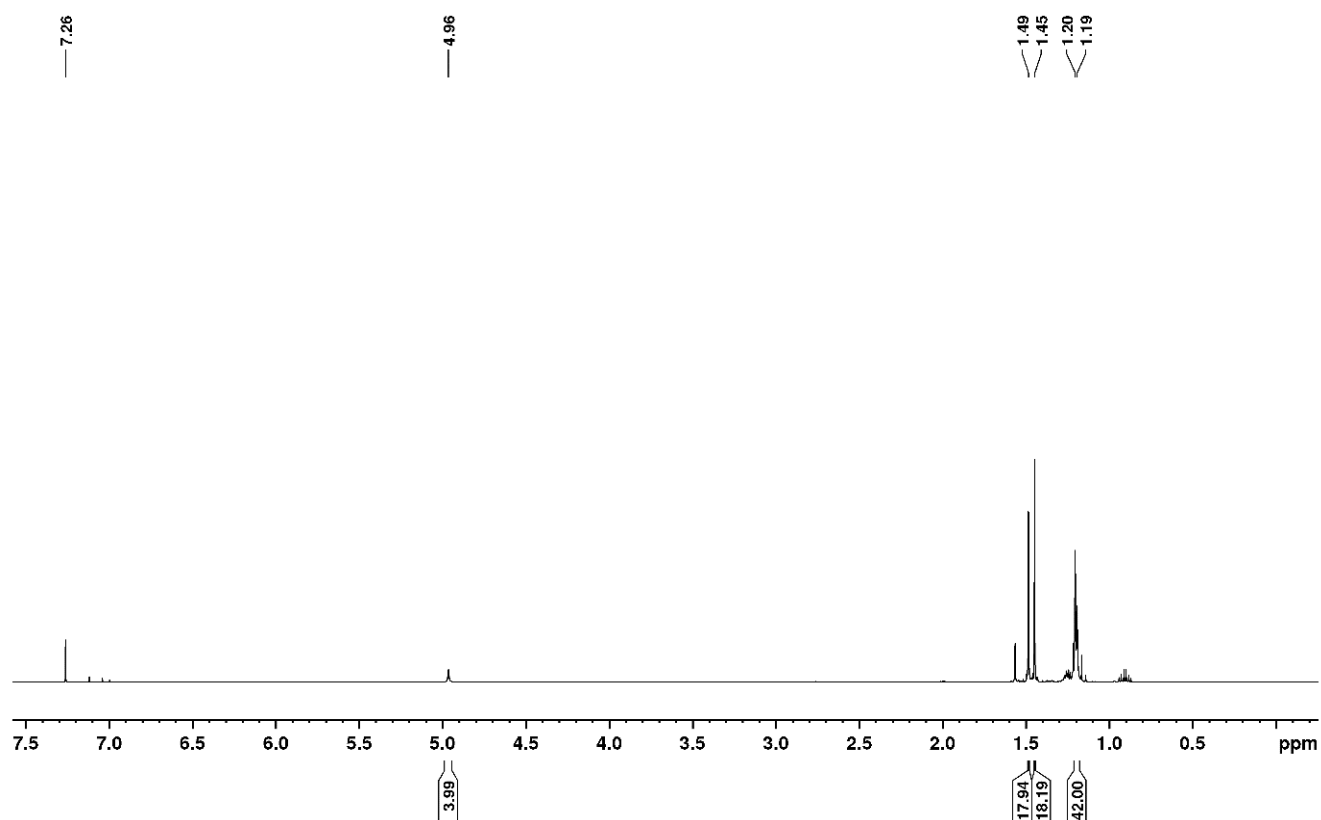Figure S29.  $^1\text{H}$  NMR (600 MHz,  $\text{CDCl}_3$ ) of **4b**.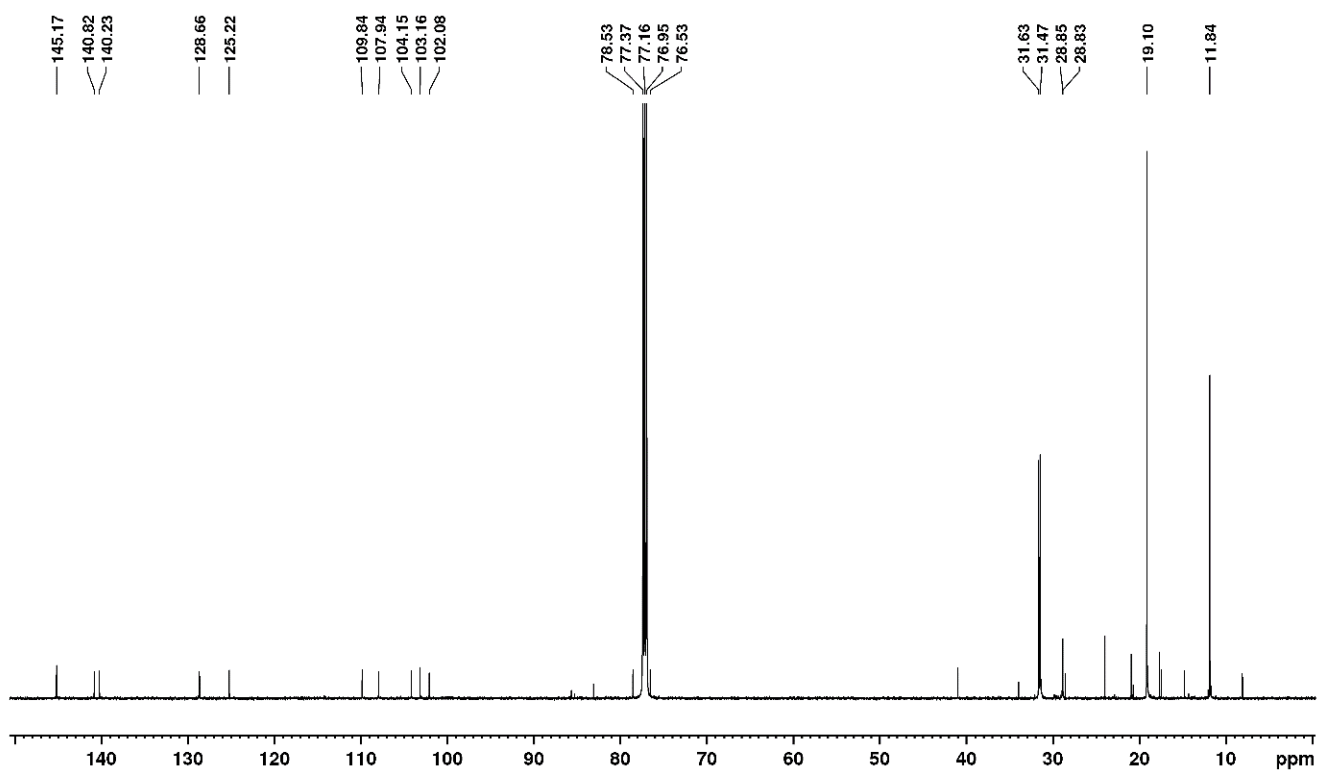Figure S30.  $^{13}\text{C}$   $\{^1\text{H}\}$  NMR 150 MHz,  $\text{CDCl}_3$ ) of **4b**.

## SUPPORTING INFORMATION

**2,3,5,12-tetrakis((triisopropylsilyl)ethynyl)-7,8,9,10-tetrakis((trimethylsilyl)ethynyl)-1,2-dihydropyrazino[2,3-b]phenazine 6**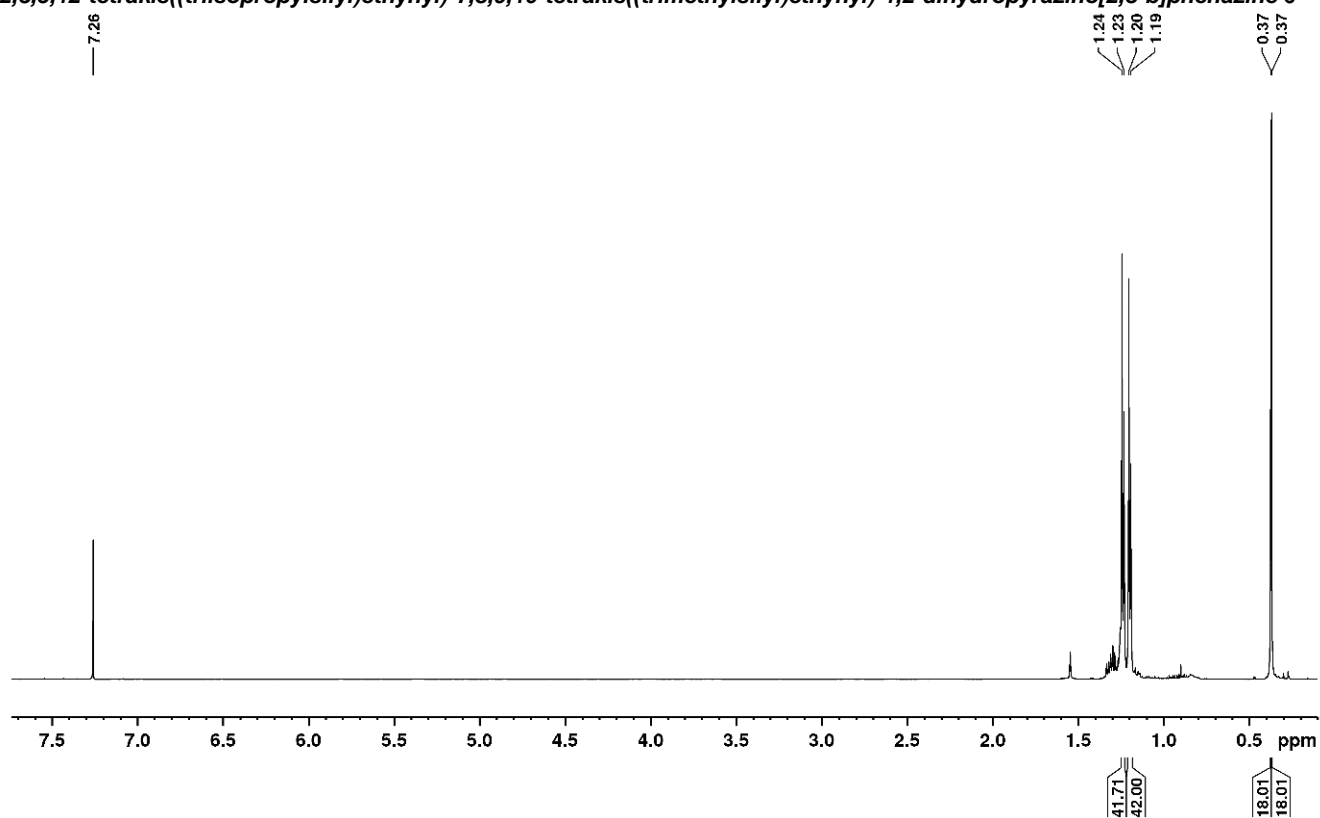Figure S31. <sup>1</sup>H NMR (600 MHz, CDCl<sub>3</sub>) of **6**.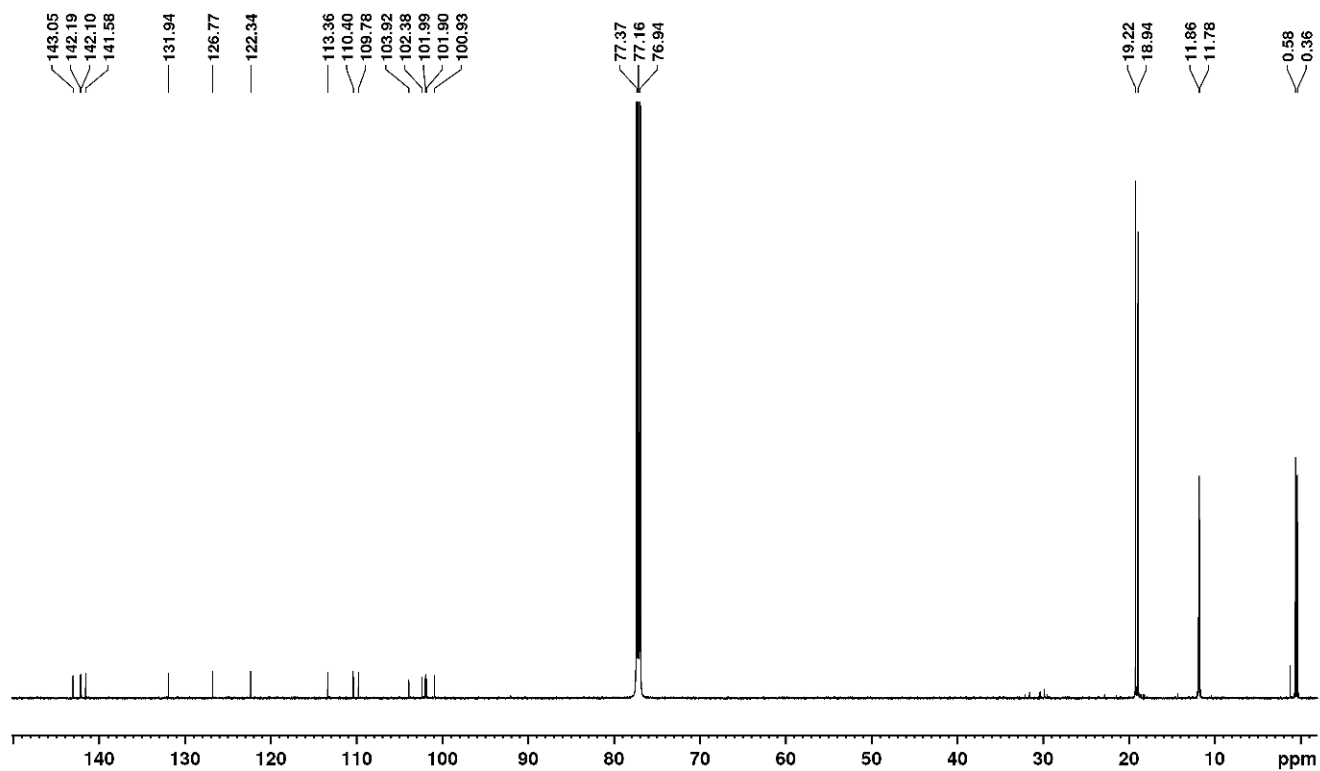Figure S32. <sup>13</sup>C {<sup>1</sup>H} NMR (150 MHz, CDCl<sub>3</sub>) of **6**.

## SUPPORTING INFORMATION

1,2,3,4-tetrabromo-6,13-bis((triisopropylsilyl)ethynyl)-8,9,10,11-tetrakis((trimethylsilyl)ethynyl)-quinoxalino[2,3-b]phenazine  
7a

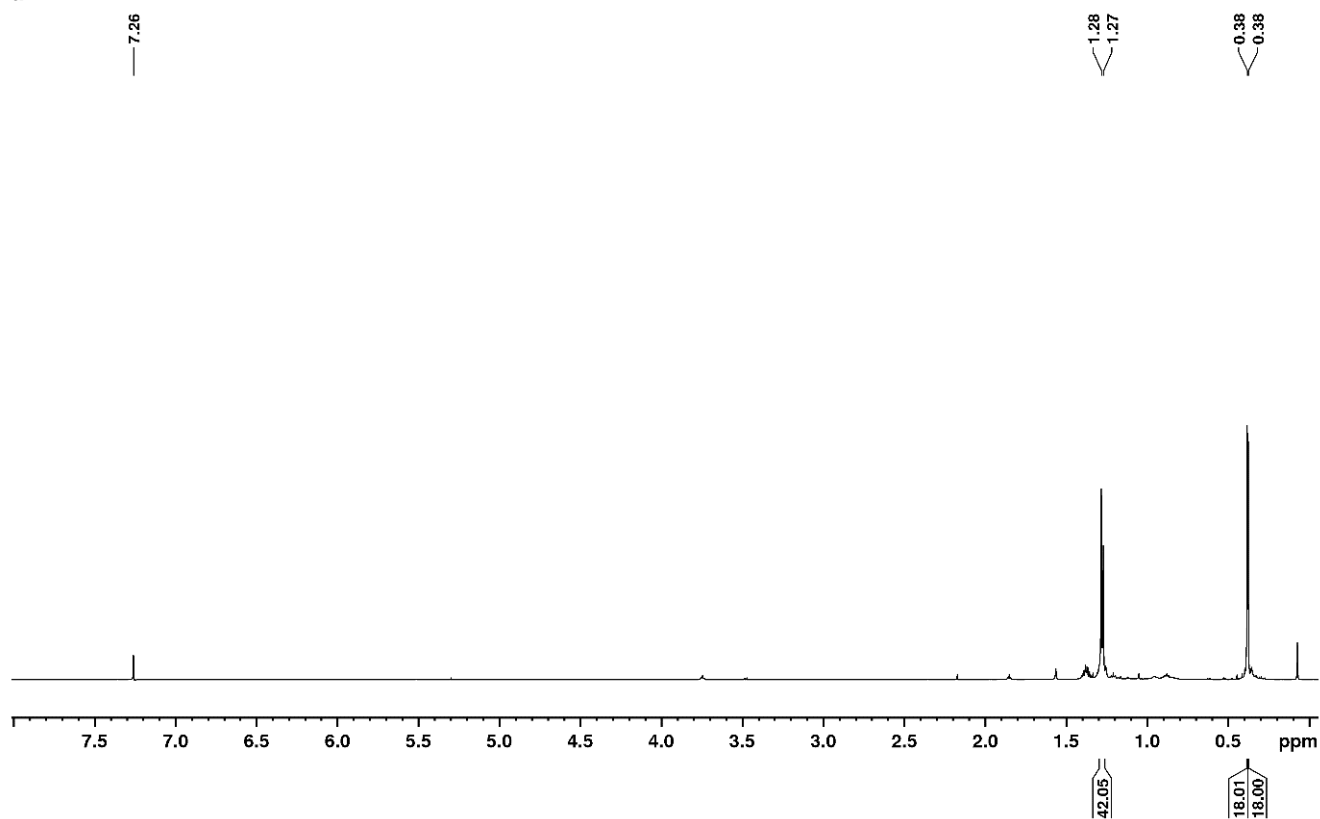

Figure S33.  $^1\text{H}$  NMR (600 MHz,  $\text{CDCl}_3$ ) of 7a.

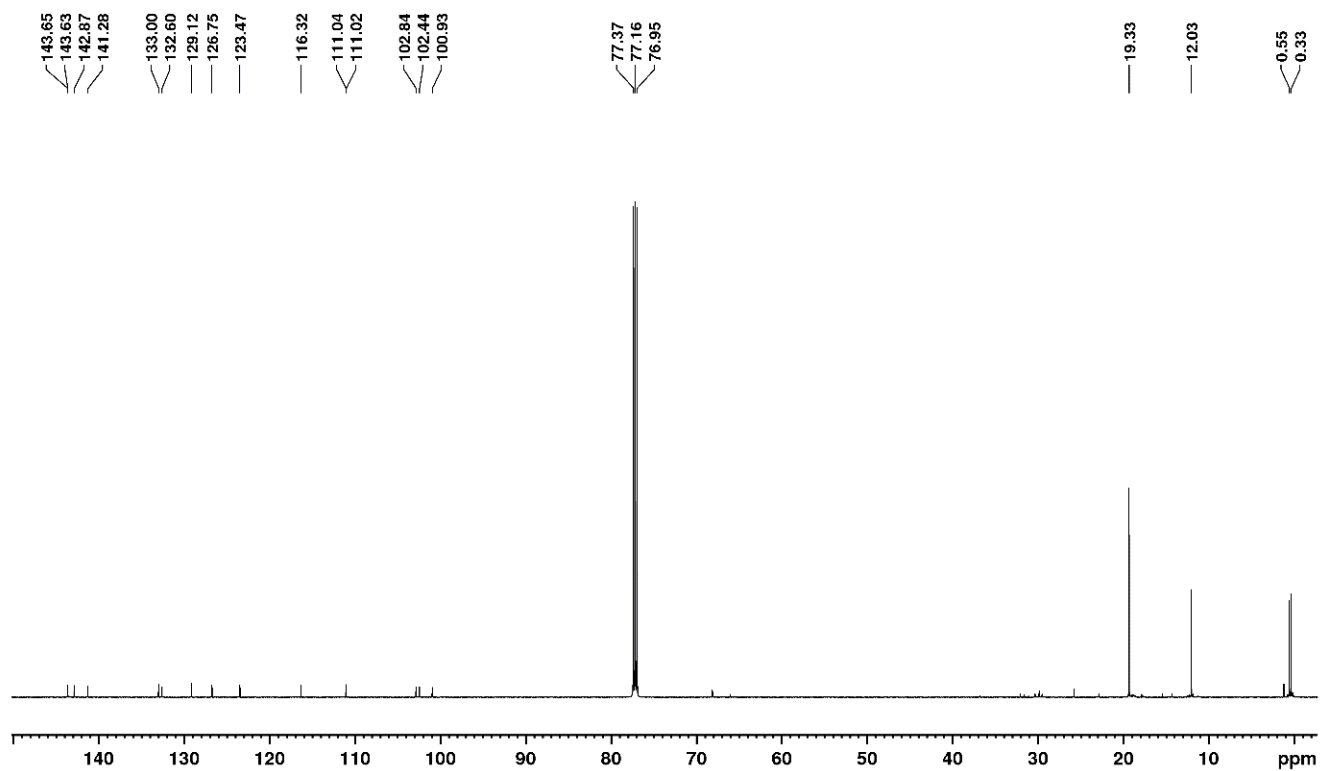

Figure S34.  $^{13}\text{C}$   $\{^1\text{H}\}$  NMR (150 MHz,  $\text{CDCl}_3$ ) of 7a.

## SUPPORTING INFORMATION

1,2,3,4-tetrabromo-8,9,10,11-tetrakis(3,3-dimethylbut-1-yn-1-yl)-6,13-bis((triisopropylsilyl)ethynyl)-5,14-dihydroquinoxalino-[2,3-b]phenazine 7b-H<sub>2</sub>

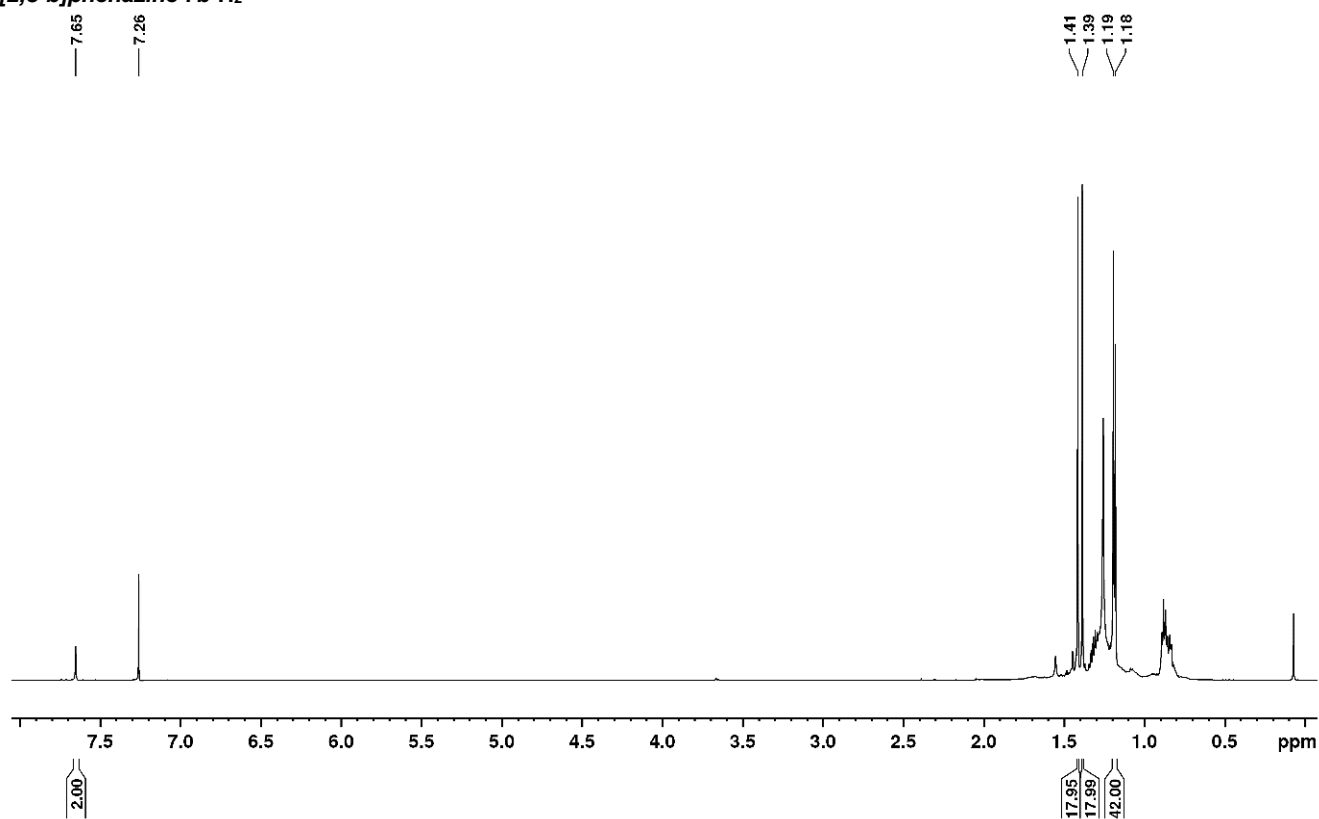

Figure S35. <sup>1</sup>H NMR (600 MHz, CDCl<sub>3</sub>) of 7b-H<sub>2</sub>.

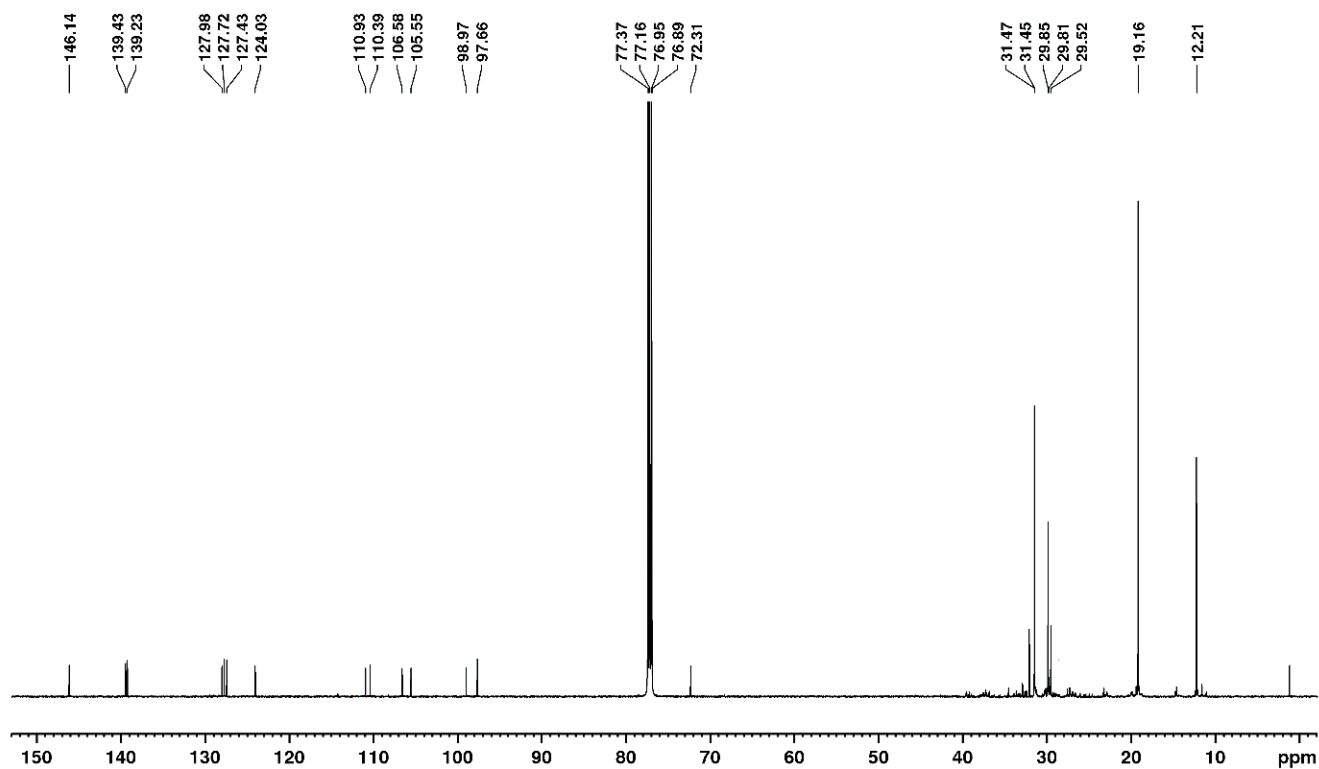

Figure S36. <sup>13</sup>C {<sup>1</sup>H} NMR (150 MHz, CDCl<sub>3</sub>) of 7b-H<sub>2</sub>.

## SUPPORTING INFORMATION

1,2,3,4,8,9,10,11-octakis(3,3-dimethylbut-1-yn-1-yl)-6,13-bis((triisopropylsilyl)ethynyl)-5,14-dihydroquinolino[2,3-b]phenazine 8-H<sub>2</sub>

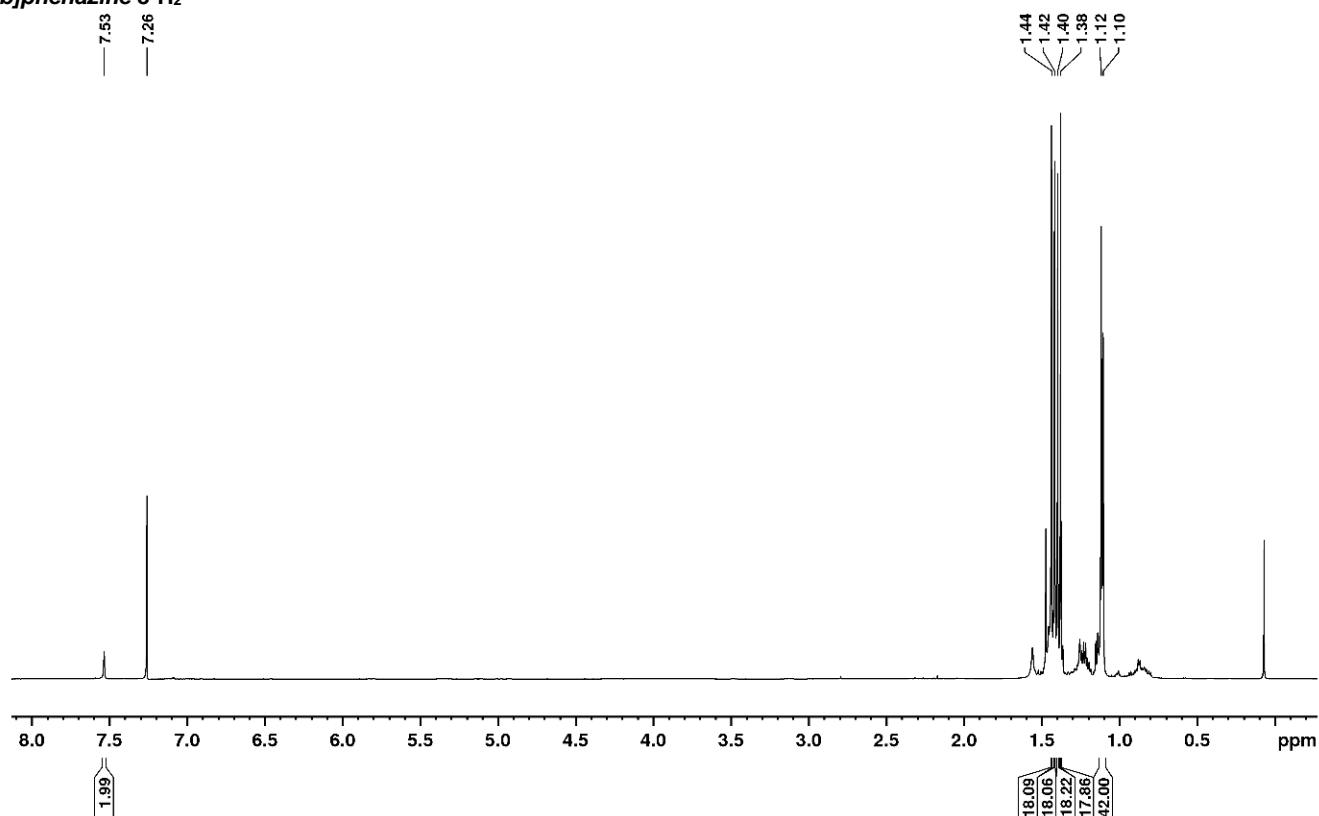

Figure S37. <sup>1</sup>H NMR (600 MHz, CDCl<sub>3</sub>) of 8-H<sub>2</sub>.

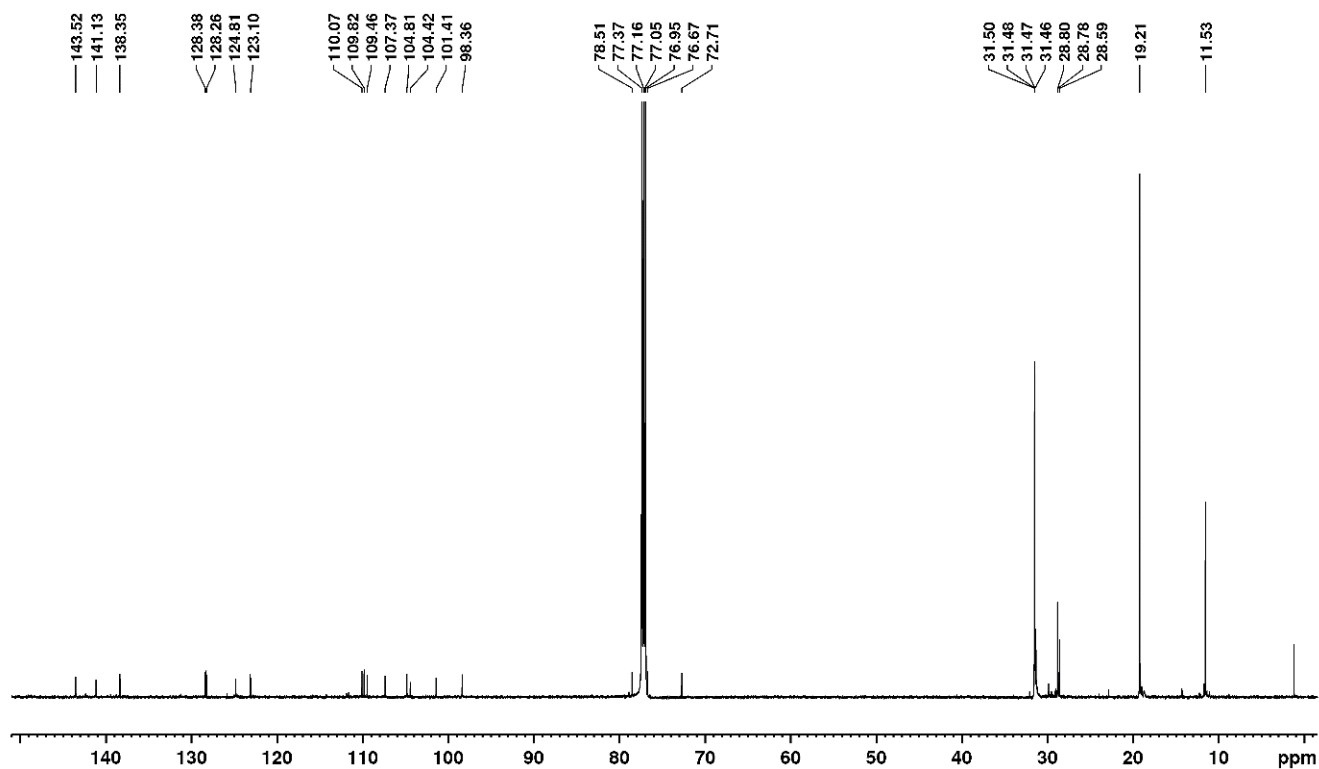

Figure S38. <sup>13</sup>C NMR (150 MHz, CDCl<sub>3</sub>) of 8-H<sub>2</sub>.

## SUPPORTING INFORMATION

**1,2,3,4,8,9,10,11-octakis(3,3-dimethylbut-1-yn-1-yl)-6,13-bis((triisopropylsilyl)ethynyl)-quinoxalino[2,3-b]phenazine 8**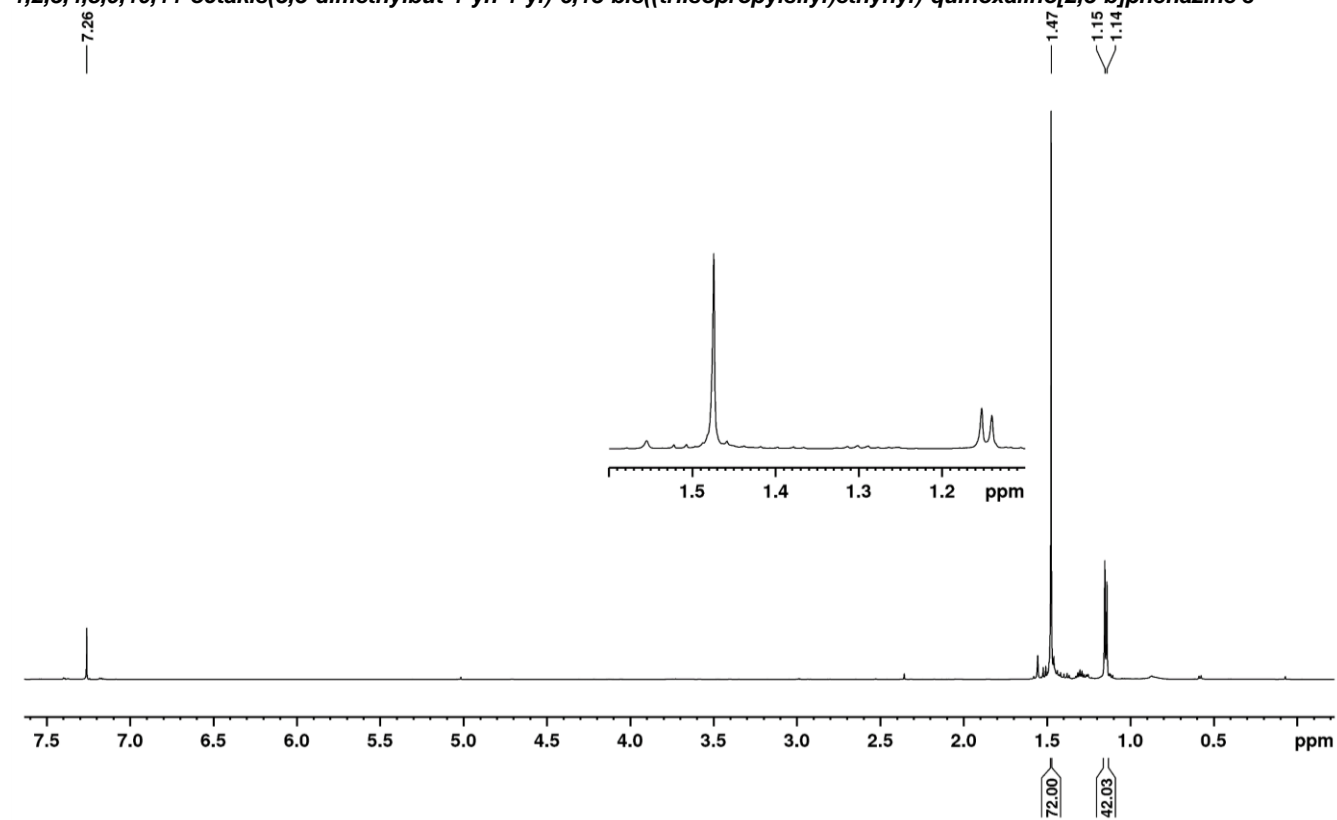Figure S39. <sup>1</sup>H NMR (600 MHz, CDCl<sub>3</sub>) of **8**.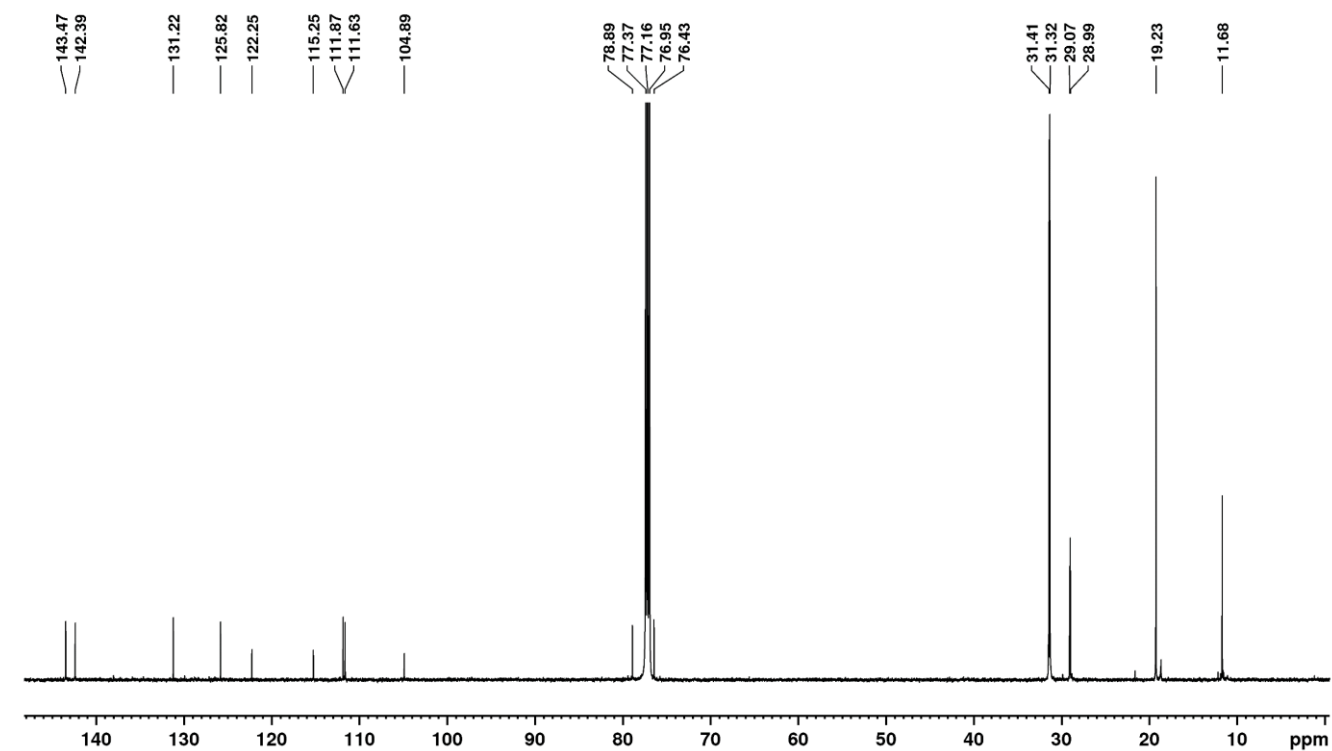Figure S40. <sup>13</sup>C {<sup>1</sup>H} NMR (150 MHz, CDCl<sub>3</sub>) of **8**.



## SUPPORTING INFORMATION

## IR-Spectra

**6,7,8,9-Tetrabromo-4,11-bis((triisopropylsilyl)ethynyl)-[1,2,5]thiadiazolo[3,4-b]phenazine 2**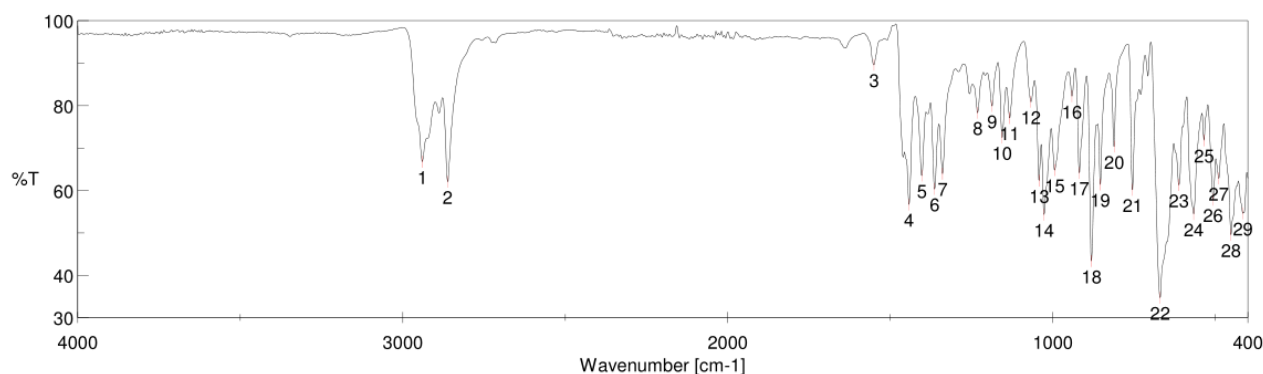

[ Result of Peak Picking ]

| No. | Position | Intensity | No. | Position | Intensity | No. | Position | Intensity |
|-----|----------|-----------|-----|----------|-----------|-----|----------|-----------|
| 1   | 2939.95  | 66.7594   | 2   | 2861.84  | 62.004    | 3   | 1550.49  | 89.5623   |
| 4   | 1442.49  | 56.6389   | 5   | 1402.96  | 63.4511   | 6   | 1363.43  | 60.2929   |
| 7   | 1339.32  | 63.9017   | 8   | 1231.33  | 78.2948   | 9   | 1186.97  | 79.8746   |
| 10  | 1156.12  | 72.4317   | 11  | 1132.97  | 77.022    | 12  | 1067.41  | 80.9025   |
| 13  | 1042.34  | 62.2957   | 14  | 1026.91  | 54.2652   | 15  | 994.125  | 64.7536   |
| 16  | 941.092  | 82.1917   | 17  | 918.914  | 64.0789   | 18  | 881.309  | 43.2936   |
| 19  | 854.311  | 61.3706   | 20  | 811.885  | 70.3189   | 21  | 754.995  | 60.0841   |
| 22  | 670.142  | 34.6419   | 23  | 612.288  | 61.2556   | 24  | 566.969  | 54.391    |
| 25  | 535.15   | 71.7427   | 26  | 507.187  | 57.764    | 27  | 489.831  | 62.8046   |
| 28  | 452.225  | 49.4567   | 29  | 415.585  | 54.561    |     |          |           |

Figure S41. IR-Spectrum of 2.

**4,11-bis((triisopropylsilyl)ethynyl)-6,7,8,9-tetrakis((trimethylsilyl)ethynyl)-5,10-dihydro-[1,2,5]thiadiazolo[3,4-b]phenazine 3a-H<sub>2</sub>**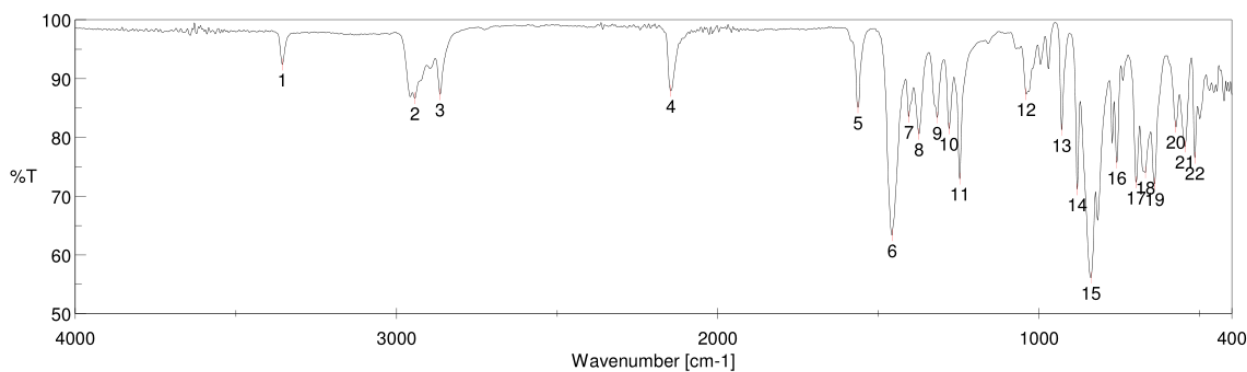

[ Result of Peak Picking ]

| No. | Position | Intensity | No. | Position | Intensity | No. | Position | Intensity |
|-----|----------|-----------|-----|----------|-----------|-----|----------|-----------|
| 1   | 3355.53  | 92.3756   | 2   | 2942.84  | 86.6525   | 3   | 2864.74  | 87.3164   |
| 4   | 2146.38  | 87.8914   | 5   | 1563.99  | 85.0935   | 6   | 1457.92  | 63.3392   |
| 7   | 1405.85  | 83.5026   | 8   | 1374.03  | 80.5737   | 9   | 1317.14  | 83.3299   |
| 10  | 1280.5   | 81.4957   | 11  | 1246.75  | 72.9347   | 12  | 1040.41  | 87.3321   |
| 13  | 929.521  | 81.2483   | 14  | 881.309  | 71.1366   | 15  | 838.883  | 56.1073   |
| 16  | 757.888  | 75.6928   | 17  | 698.105  | 72.3221   | 18  | 669.178  | 74.0124   |
| 19  | 640.251  | 72.1054   | 20  | 574.683  | 81.7918   | 21  | 545.756  | 78.4297   |
| 22  | 515.865  | 76.4948   |     |          |           |     |          |           |

Figure S42. IR-Spectrum of 3a-H<sub>2</sub>.

## SUPPORTING INFORMATION

**4,11-bis((triisopropylsilyl)ethynyl)-6,7,8,9-tetrakis(trimethylsilyl)ethynyl-[1,2,5]thiadiazolo[3,4-b]phenazine 3a**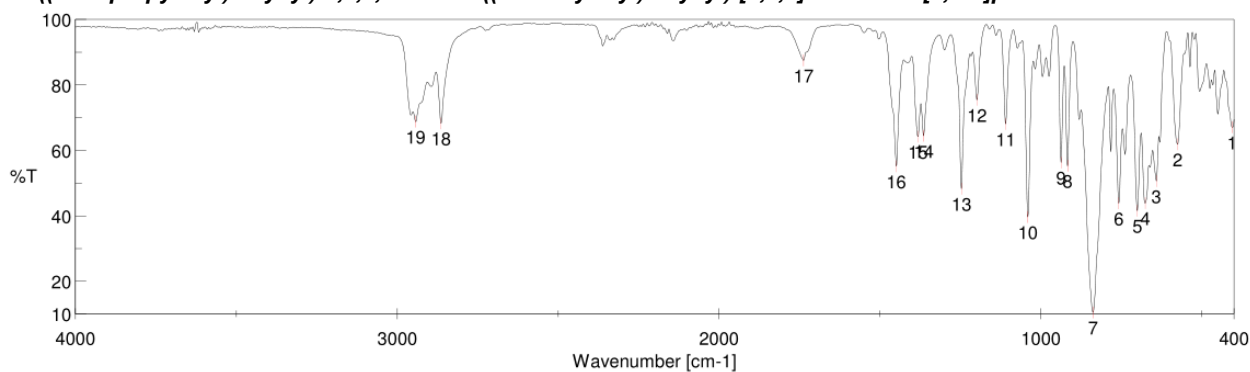

[ Result of Peak Picking ]

| No. | Position | Intensity | No. | Position | Intensity | No. | Position | Intensity |
|-----|----------|-----------|-----|----------|-----------|-----|----------|-----------|
| 1   | 405.942  | 67.0224   | 2   | 575.647  | 61.8316   | 3   | 641.215  | 50.5976   |
| 4   | 675.928  | 43.8654   | 5   | 700.998  | 41.4959   | 6   | 757.888  | 43.808    |
| 7   | 837.919  | 10.3845   | 8   | 916.986  | 55.2279   | 9   | 937.235  | 56.2307   |
| 10  | 1040.41  | 39.5949   | 11  | 1109.83  | 68.0403   | 12  | 1198.54  | 75.3886   |
| 13  | 1246.75  | 48.2417   | 14  | 1364.39  | 64.3966   | 15  | 1381.75  | 64.131    |
| 16  | 1449.24  | 55.0951   | 17  | 1737.55  | 87.4954   | 18  | 2863.77  | 68.2489   |
| 19  | 2942.84  | 68.7437   |     |          |           |     |          |           |

Figure S43. IR-Spectrum of 3a.

**6,7,8,9-tetrakis(3,3-dimethylbut-1-yn-1-yl)-4,11-bis((triisopropylsilyl)ethynyl)-5,10-dihydro-[1,2,5]thiadiazolo[3,4-b]phenazine 3b-H<sub>2</sub>**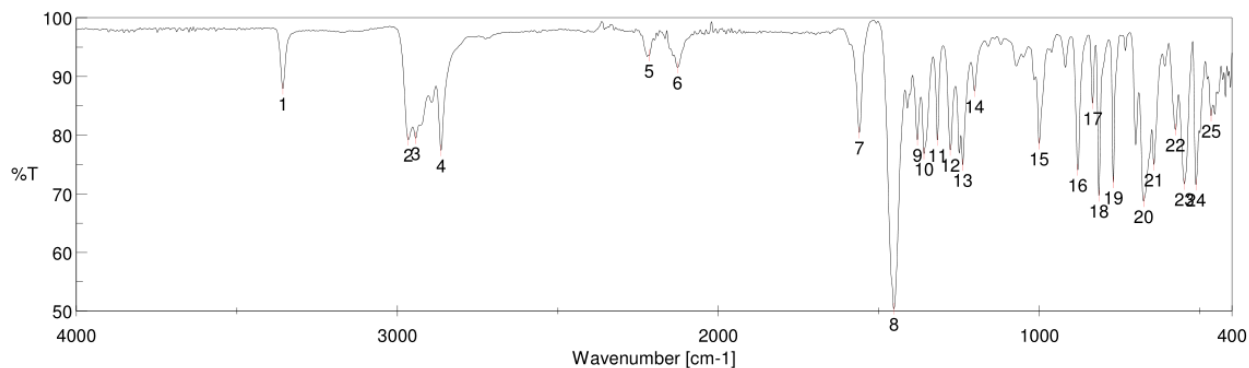

[ Result of Peak Picking ]

| No. | Position | Intensity | No. | Position | Intensity | No. | Position | Intensity |
|-----|----------|-----------|-----|----------|-----------|-----|----------|-----------|
| 1   | 3356.5   | 87.9146   | 2   | 2965.98  | 79.1848   | 3   | 2942.84  | 79.4707   |
| 4   | 2863.77  | 77.4013   | 5   | 2215.81  | 93.5449   | 6   | 2127.1   | 91.5429   |
| 7   | 1561.09  | 80.4396   | 8   | 1453.1   | 50.3572   | 9   | 1379.82  | 79.2035   |
| 10  | 1359.57  | 76.8456   | 11  | 1317.14  | 79.1501   | 12  | 1277.61  | 77.4571   |
| 13  | 1239.04  | 74.8933   | 14  | 1202.4   | 87.5048   | 15  | 1000.87  | 78.538    |
| 16  | 880.345  | 74.0589   | 17  | 834.062  | 85.4354   | 18  | 814.777  | 69.6437   |
| 19  | 769.458  | 71.9323   | 20  | 674.963  | 68.743    | 21  | 643.144  | 74.9531   |
| 22  | 576.612  | 80.9448   | 23  | 548.649  | 71.667    | 24  | 512.008  | 71.5343   |
| 25  | 464.761  | 83.2968   |     |          |           |     |          |           |

Figure S44. IR-Spectrum of 3b-H<sub>2</sub>.

## SUPPORTING INFORMATION

**6,7,8,9-tetrakis(3,3-dimethylbut-1-yn-1-yl)-4,11-bis((triisopropylsilyl)ethynyl)-[1,2,5]thiadiazolo[3,4-b]phenazine 3b**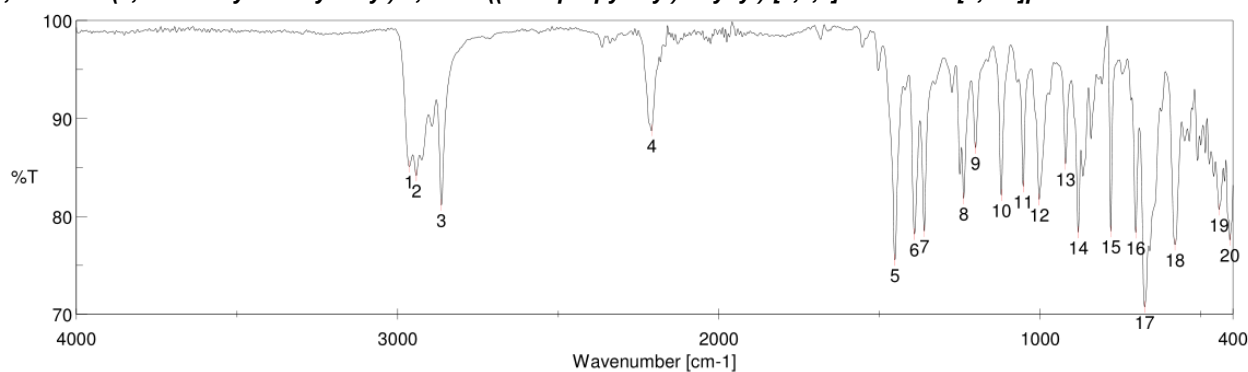

[ Result of Peak Picking ]

| No. | Position | Intensity | No. | Position | Intensity | No. | Position | Intensity |
|-----|----------|-----------|-----|----------|-----------|-----|----------|-----------|
| 1   | 2964.05  | 85.087    | 2   | 2941.88  | 84.1647   | 3   | 2863.77  | 81.1574   |
| 4   | 2209.06  | 88.7832   | 5   | 1452.14  | 75.5378   | 6   | 1391.39  | 78.1687   |
| 7   | 1360.53  | 78.4838   | 8   | 1238.08  | 81.8161   | 9   | 1201.43  | 86.9878   |
| 10  | 1121.4   | 82.152    | 11  | 1052.94  | 83.0264   | 12  | 1002.8   | 81.6937   |
| 13  | 920.843  | 85.3477   | 14  | 881.309  | 78.3559   | 15  | 780.065  | 78.4509   |
| 16  | 702.926  | 78.3363   | 17  | 674.963  | 70.728    | 18  | 580.469  | 77.1055   |
| 19  | 443.547  | 80.6735   | 20  | 409.799  | 77.5911   |     |          |           |

Figure S45. IR-Spectrum of 3b.

**1,4-bis((triisopropylsilyl)ethynyl)-6,7,8,9-tetrakis((trimethylsilyl)ethynyl)phenazine-2,3-diamine 4a**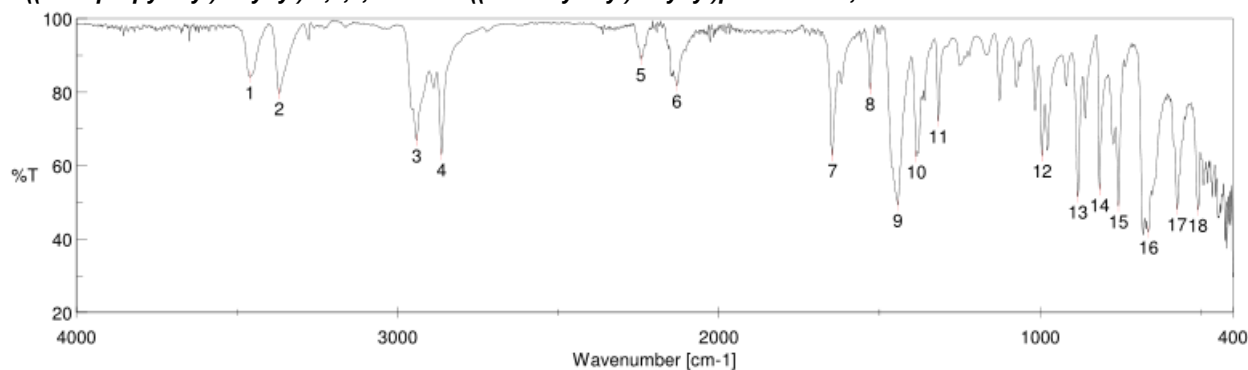

[ Result of Peak Picking ]

| No. | Position | Intensity | No. | Position | Intensity | No. | Position | Intensity |
|-----|----------|-----------|-----|----------|-----------|-----|----------|-----------|
| 1   | 3459.19  | 84.0572   | 2   | 3369.03  | 79.658    | 3   | 2940.91  | 66.9223   |
| 4   | 2863.29  | 63.0365   | 5   | 2242.81  | 88.9323   | 6   | 2130.47  | 81.6942   |
| 7   | 1646.43  | 62.7612   | 8   | 1529.27  | 80.9399   | 9   | 1442.98  | 49.279    |
| 10  | 1385.6   | 62.4678   | 11  | 1317.14  | 72.094    | 12  | 994.125  | 62.7044   |
| 13  | 882.756  | 51.4922   | 14  | 815.259  | 53.4662   | 15  | 756.441  | 48.9811   |
| 16  | 662.911  | 41.9234   | 17  | 573.719  | 48.1055   | 18  | 508.633  | 47.8854   |

Figure S46. IR-Spectrum of 4a.

## SUPPORTING INFORMATION

**6,7,8,9-tetrakis(3,3-dimethylbut-1-yn-1-yl)-1,4-bis((triisopropylsilyl)ethynyl)phenazine-2,3-diamine 4b**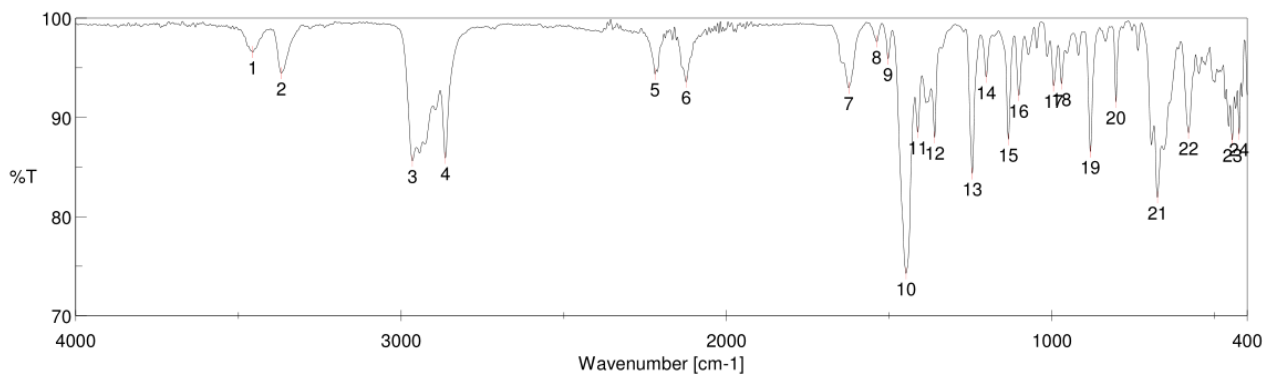

[ Result of Peak Picking ]

| No. | Position | Intensity | No. | Position | Intensity | No. | Position | Intensity |
|-----|----------|-----------|-----|----------|-----------|-----|----------|-----------|
| 1   | 3455.81  | 96.572    | 2   | 3368.07  | 94.4582   | 3   | 2965.02  | 85.6143   |
| 4   | 2863.77  | 85.8956   | 5   | 2219.67  | 94.3562   | 6   | 2124.21  | 93.5877   |
| 7   | 1624.73  | 92.9654   | 8   | 1538.92  | 97.6373   | 9   | 1504.2   | 95.908    |
| 10  | 1448.28  | 74.2731   | 11  | 1412.6   | 88.4936   | 12  | 1360.53  | 87.9697   |
| 13  | 1244.83  | 84.3172   | 14  | 1202.4   | 94.067    | 15  | 1133.94  | 87.7623   |
| 16  | 1102.12  | 92.2194   | 17  | 995.089  | 93.1905   | 18  | 970.983  | 93.3932   |
| 19  | 882.274  | 86.545    | 20  | 803.206  | 91.5446   | 21  | 675.928  | 81.9142   |
| 22  | 580.469  | 88.4399   | 23  | 445.476  | 87.7484   | 24  | 425.227  | 88.3114   |

Figure S47. IR-Spectrum of 4b.

**2,3,5,12-tetrakis((triisopropylsilyl)ethynyl)-7,8,9,10-tetrakis((trimethylsilyl)ethynyl)-1,2-dihydropyrazino[2,3-b]phenazine 6**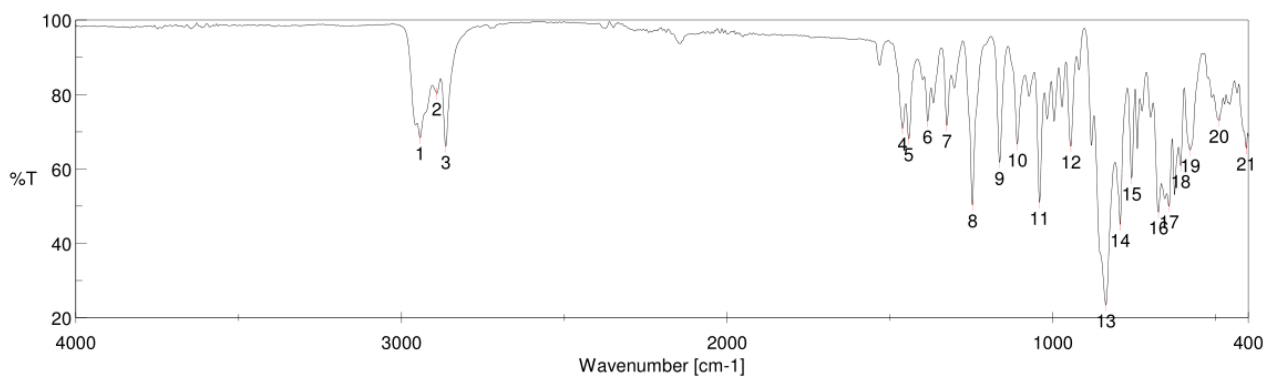

[ Result of Peak Picking ]

| No. | Position | Intensity | No. | Position | Intensity | No. | Position | Intensity |
|-----|----------|-----------|-----|----------|-----------|-----|----------|-----------|
| 1   | 2942.84  | 68.3954   | 2   | 2891.74  | 80.2756   | 3   | 2863.77  | 66.0058   |
| 4   | 1461.78  | 70.8935   | 5   | 1442.49  | 68.037    | 6   | 1384.64  | 72.8009   |
| 7   | 1325.82  | 71.6423   | 8   | 1246.75  | 50.2434   | 9   | 1163.83  | 61.7164   |
| 10  | 1108.87  | 66.5744   | 11  | 1041.37  | 50.8982   | 12  | 944.949  | 66.0964   |
| 13  | 836.955  | 23.3813   | 14  | 793.564  | 44.9833   | 15  | 757.888  | 57.4849   |
| 16  | 675.928  | 48.3399   | 17  | 643.144  | 49.9576   | 18  | 607.467  | 60.836    |
| 19  | 578.54   | 65.0471   | 20  | 489.831  | 73.0219   | 21  | 405.942  | 65.5448   |

Figure S48. IR-Spectrum of 6.

## SUPPORTING INFORMATION

**1,2,3,4-tetrabromo-6,13-bis((triisopropylsilyl)ethynyl)-8,9,10,11-tetrakis((trimethylsilyl)ethynyl)-quinoxalino[2,3-b]phenazine**

7a

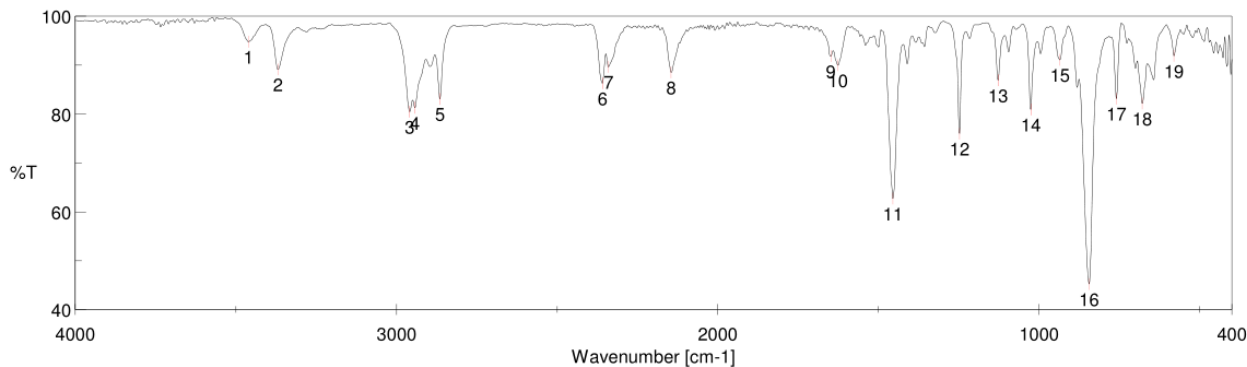

[ Result of Peak Picking ]

| No. | Position | Intensity | No. | Position | Intensity | No. | Position | Intensity |
|-----|----------|-----------|-----|----------|-----------|-----|----------|-----------|
| 1   | 3460.63  | 94.7488   | 2   | 3369.03  | 89.1031   | 3   | 2959.23  | 80.4445   |
| 4   | 2942.84  | 81.2734   | 5   | 2864.74  | 83.0575   | 6   | 2359.48  | 86.2804   |
| 7   | 2340.19  | 89.6264   | 8   | 2145.42  | 88.5059   | 9   | 1647.88  | 91.809    |
| 10  | 1625.7   | 89.9516   | 11  | 1455.03  | 62.6911   | 12  | 1247.72  | 75.96     |
| 13  | 1128.15  | 86.8895   | 14  | 1025.94  | 80.9233   | 15  | 935.306  | 91.052    |
| 16  | 844.669  | 45.2005   | 17  | 759.816  | 83.1102   | 18  | 678.82   | 82.1448   |
| 19  | 580.469  | 91.8873   |     |          |           |     |          |           |

Figure S49. IR-Spectrum of 7a.

**1,2,3,4-tetrabromo-8,9,10,11-tetrakis(3,3-dimethylbut-1-yn-1-yl)-6,13-bis((triisopropylsilyl)ethynyl)-5,14-dihydroquinoxalino[2,3-b]phenazine 7b-H<sub>2</sub>**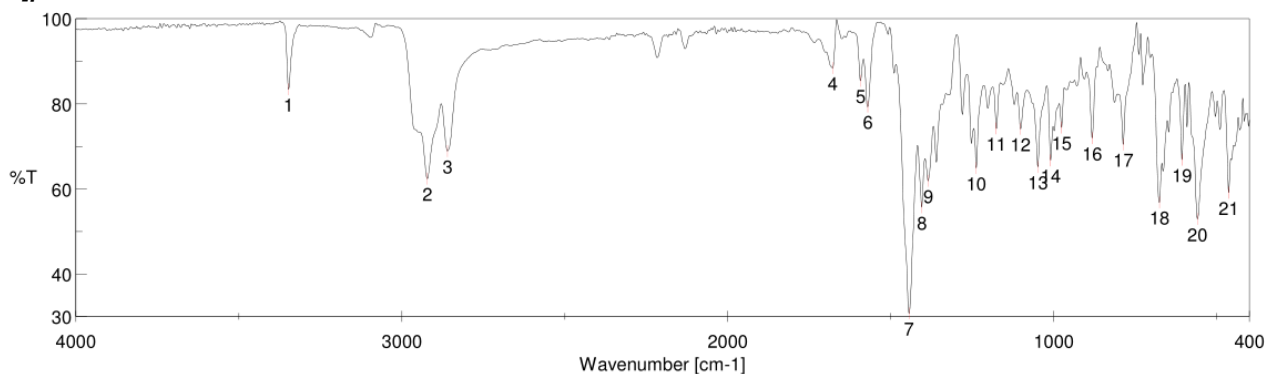

[ Result of Peak Picking ]

| No. | Position | Intensity | No. | Position | Intensity | No. | Position | Intensity |
|-----|----------|-----------|-----|----------|-----------|-----|----------|-----------|
| 1   | 3347.82  | 83.4104   | 2   | 2921.63  | 62.3839   | 3   | 2859.92  | 68.8847   |
| 4   | 1678.73  | 88.4099   | 5   | 1592.91  | 85.3973   | 6   | 1570.74  | 79.3305   |
| 7   | 1444.42  | 30.7093   | 8   | 1404.89  | 55.6316   | 9   | 1385.6   | 61.8858   |
| 10  | 1238.08  | 64.8514   | 11  | 1176.36  | 74.1998   | 12  | 1102.12  | 74.0721   |
| 13  | 1049.09  | 65.124    | 14  | 1009.55  | 66.689    | 15  | 975.804  | 74.4167   |
| 16  | 882.274  | 71.9082   | 17  | 786.815  | 70.4246   | 18  | 675.928  | 56.8389   |
| 19  | 606.503  | 66.8593   | 20  | 559.255  | 52.9244   | 21  | 463.796  | 59.082    |

Figure S50. IR-Spectrum of 7b-H<sub>2</sub>.

## SUPPORTING INFORMATION

**1,2,3,4,8,9,10,11-octakis(3,3-dimethylbut-1-yn-1-yl)-6,13-bis((triisopropylsilyl)ethynyl)-5,14-dihydroquinoxalino[2,3-b]phenazine 8-H<sub>2</sub>**

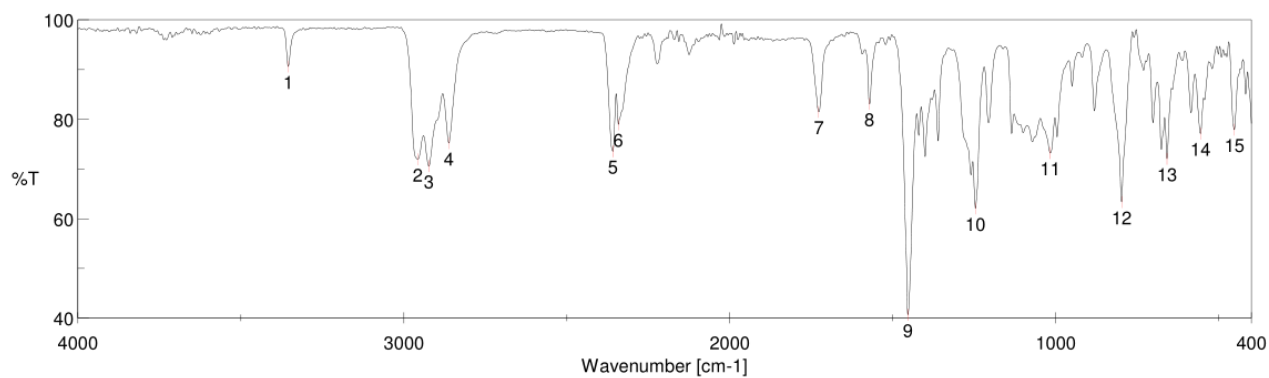

[ Result of Peak Picking ]

| No. | Position | Intensity | No. | Position | Intensity | No. | Position | Intensity |
|-----|----------|-----------|-----|----------|-----------|-----|----------|-----------|
| 1   | 3354.57  | 90.5914   | 3   | 2923.56  | 70.5474   | 6   | 2342.12  | 78.9488   |
| 4   | 2861.84  | 75.1866   | 5   | 2359.48  | 73.5297   | 9   | 1454.06  | 40.6346   |
| 7   | 1726.94  | 81.4599   | 8   | 1571.7   | 83.0736   | 12  | 798.385  | 63.3202   |
| 10  | 1246.75  | 62.019    | 11  | 1017.27  | 73.1964   | 15  | 452.225  | 77.8672   |
| 13  | 658.571  | 72.0352   | 14  | 556.363  | 77.083    |     |          |           |

**Figure S51.** IR-Spectrum of 8-H<sub>2</sub>.

## SUPPORTING INFORMATION

**1,2,3,4,8,9,10,11-octakis(3,3-dimethylbut-1-yn-1-yl)-6,13-bis((triisopropylsilyl)ethynyl)-quinoxalino[2,3-b]phenazine 8**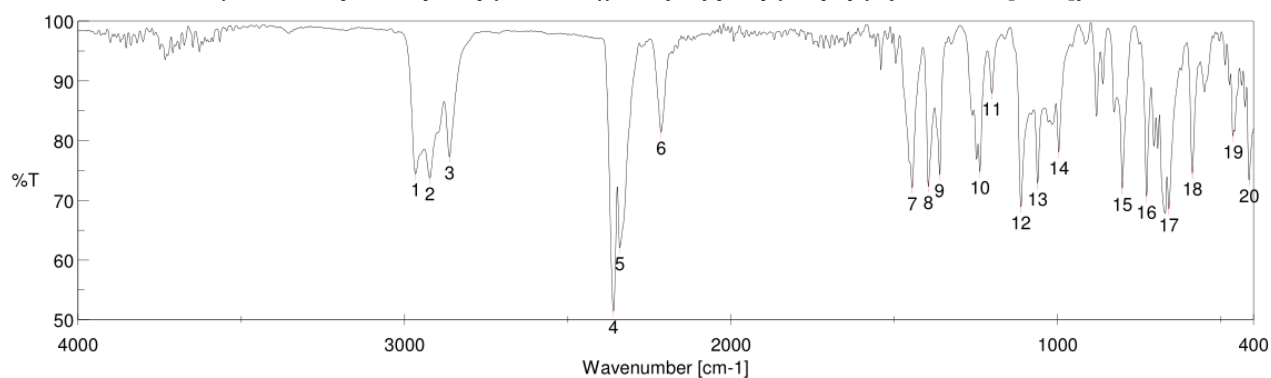

[ Result of Peak Picking ]

| No. | Position | Intensity | No. | Position | Intensity | No. | Position | Intensity |
|-----|----------|-----------|-----|----------|-----------|-----|----------|-----------|
| 1   | 2965.98  | 74.3961   | 2   | 2922.59  | 73.7373   | 3   | 2862.81  | 77.2553   |
| 4   | 2360.44  | 51.4052   | 5   | 2341.16  | 61.9754   | 6   | 2214.84  | 81.3689   |
| 7   | 1445.39  | 72.0328   | 8   | 1396.21  | 72.2811   | 9   | 1361.5   | 74.2614   |
| 10  | 1238.08  | 74.7664   | 11  | 1201.43  | 87.9008   | 12  | 1112.73  | 68.846    |
| 13  | 1061.62  | 72.7826   | 14  | 996.053  | 78.0651   | 15  | 802.242  | 71.9477   |
| 16  | 727.996  | 70.6019   | 17  | 659.536  | 68.4937   | 18  | 587.218  | 74.5409   |
| 19  | 462.832  | 80.703    | 20  | 413.656  | 73.3899   |     |          |           |

Figure S52. IR-Spectrum of 8.

## SUPPORTING INFORMATION

## Crystallographic Data

**2,3,5,12-tetrakis((triisopropylsilyl)ethynyl)-7,8,9,10-tetrakis((trimethylsilyl)ethynyl)-1,2-dihydropyrazino[2,3-b]phenazine 6**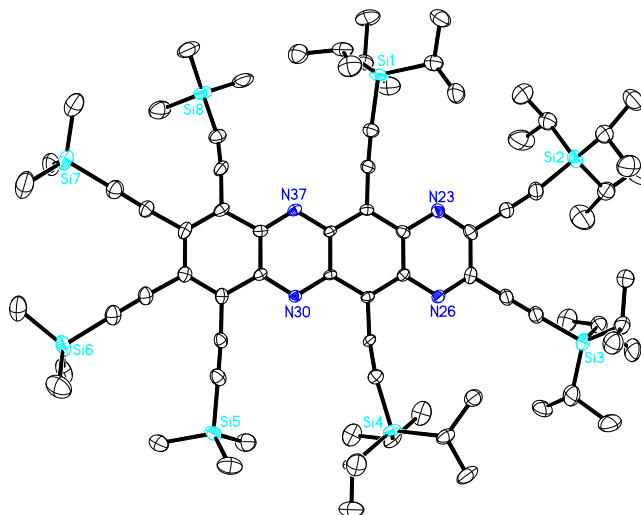

|                                   |                                                                                 |                     |
|-----------------------------------|---------------------------------------------------------------------------------|---------------------|
| Identification code               | hir26                                                                           |                     |
| Empirical formula                 | C <sub>79</sub> H <sub>121</sub> Cl <sub>3</sub> N <sub>4</sub> Si <sub>8</sub> |                     |
| Formula weight                    | 1457.86                                                                         |                     |
| Temperature                       | 100(2) K                                                                        |                     |
| Wavelength                        | 1.54178 Å                                                                       |                     |
| Crystal system                    | monoclinic                                                                      |                     |
| Space group                       | P2 <sub>1</sub> /c                                                              |                     |
| Z                                 | 8                                                                               |                     |
| Unit cell dimensions              | a = 32.9037(5) Å                                                                | α = 90 deg.         |
|                                   | b = 14.3345(2) Å                                                                | β = 101.969(1) deg. |
|                                   | c = 38.9730(6) Å                                                                | γ = 90 deg.         |
| Volume                            | 17982.3(5) Å <sup>3</sup>                                                       |                     |
| Density (calculated)              | 1.08 g/cm <sup>3</sup>                                                          |                     |
| Absorption coefficient            | 2.24 mm <sup>-1</sup>                                                           |                     |
| Crystal shape                     | plate                                                                           |                     |
| Crystal size                      | 0.129 x 0.107 x 0.071 mm <sup>3</sup>                                           |                     |
| Crystal colour                    | darkgreen                                                                       |                     |
| Theta range for data collection   | 2.9 to 68.4 deg.                                                                |                     |
| Index ranges                      | -39 ≤ h ≤ 37, -11 ≤ k ≤ 17, -46 ≤ l ≤ 42                                        |                     |
| Reflections collected             | 109356                                                                          |                     |
| Independent reflections           | 31299 (R(int) = 0.0778)                                                         |                     |
| Observed reflections              | 17668 (I > 2σ(I))                                                               |                     |
| Absorption correction             | Semi-empirical from equivalents                                                 |                     |
| Max. and min. transmission        | 1.89 and 0.49                                                                   |                     |
| Refinement method                 | Full-matrix least-squares on F <sup>2</sup>                                     |                     |
| Data/restraints/parameters        | 31299 / 393 / 1809                                                              |                     |
| Goodness-of-fit on F <sup>2</sup> | 0.92                                                                            |                     |
| Final R indices (I > 2σ(I))       | R1 = 0.067, wR2 = 0.162                                                         |                     |
| Largest diff. peak and hole       | 1.46 and -0.79 eÅ <sup>-3</sup>                                                 |                     |

**Figure S53.** Crystal data and structure of **6** (CCDC 1947891).



## SUPPORTING INFORMATION

**1,2,3,4,8,9,10,11-octakis(3,3-dimethylbut-1-yn-1-yl)-6,13-bis((triisopropylsilyl)ethynyl)-quinoxalino[2,3-b]phenazine 8**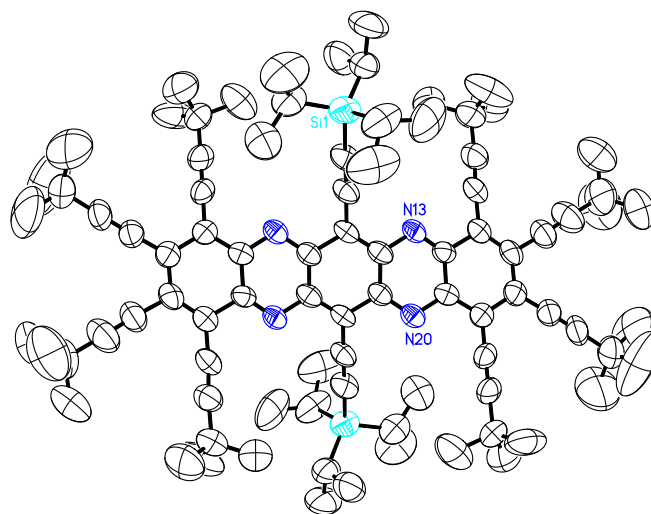

|                                   |                                                                 |                      |
|-----------------------------------|-----------------------------------------------------------------|----------------------|
| Identification code               | hir30                                                           |                      |
| Empirical formula                 | C <sub>88</sub> H <sub>114</sub> N <sub>4</sub> Si <sub>2</sub> |                      |
| Formula weight                    | 1284.01                                                         |                      |
| Temperature                       | 200(2) K                                                        |                      |
| Wavelength                        | 1.54178 Å                                                       |                      |
| Crystal system                    | monoclinic                                                      |                      |
| Space group                       | P2 <sub>1</sub> /n                                              |                      |
| Z                                 | 2                                                               |                      |
| Unit cell dimensions              | a = 20.607(4) Å                                                 | α = 90 deg.          |
|                                   | b = 11.2149(12) Å                                               | β = 114.614(13) deg. |
|                                   | c = 20.920(3) Å                                                 | γ = 90 deg.          |
| Volume                            | 4395.5(12) Å <sup>3</sup>                                       |                      |
| Density (calculated)              | 0.97 g/cm <sup>3</sup>                                          |                      |
| Absorption coefficient            | 0.67 mm <sup>-1</sup>                                           |                      |
| Crystal shape                     | plank                                                           |                      |
| Crystal size                      | 0.222 x 0.043 x 0.021 mm <sup>3</sup>                           |                      |
| Crystal colour                    | purple                                                          |                      |
| Theta range for data collection   | 2.5 to 47.8 deg.                                                |                      |
| Index ranges                      | -19 ≤ h ≤ 19, -10 ≤ k ≤ 9, -20 ≤ l ≤ 19                         |                      |
| Reflections collected             | 14830                                                           |                      |
| Independent reflections           | 4066 (R(int) = 0.1411)                                          |                      |
| Observed reflections              | 2446 (I > 2σ(I))                                                |                      |
| Absorption correction             | Semi-empirical from equivalents                                 |                      |
| Max. and min. transmission        | 2.05 and 0.53                                                   |                      |
| Refinement method                 | Full-matrix least-squares on F <sup>2</sup>                     |                      |
| Data/restraints/parameters        | 4066 / 624 / 425                                                |                      |
| Goodness-of-fit on F <sup>2</sup> | 2.31                                                            |                      |
| Final R indices (I > 2σ(I))       | R1 = 0.170, wR2 = 0.368                                         |                      |
| Largest diff. peak and hole       | 0.35 and -0.37 eÅ <sup>-3</sup>                                 |                      |

**Figure S54.** Crystal data and structure of **8** (CCDC 1947892).

## SUPPORTING INFORMATION

## References

- [1] G. R. Fulmer, A. J. M. Miller, N. H. Sherden, H. E. Gottlieb, A. Nudelman, B. M. Stoltz, J. E. Bercaw, K. I. Goldberg, *Organometallics* **2010**, *29*, 2176-2179.
- [2] Gaussian 09, Revision D.01, M. J. Frisch, G. W. Trucks, H. B. Schlegel, G. E. Scuseria, M. A. Robb, J. R. Cheeseman, G. Scalmani, V. Barone, B. Mennucci, G. A. Petersson, H. Nakatsuji, M. Caricato, X. Li, H. P. Hratchian, A. F. Izmaylov, J. Bloino, G. Zheng, J. L. Sonnenberg, M. Hada, M. Ehara, K. Toyota, R. Fukuda, J. Hasegawa, M. Ishida, T. Nakajima, Y. Honda, O. Kitao, H. Nakai, T. Vreven, J. A. Montgomery, Jr., J. E. Peralta, F. Ogliaro, M. Bearpark, J. J. Heyd, E. Brothers, K. N. Kudin, V. N. Staroverov, R. Kobayashi, J. Normand, K. Raghavachari, A. Rendell, J. C. Burant, S. S. Iyengar, J. Tomasi, M. Cossi, N. Rega, J. M. Millam, M. Klene, J. E. Knox, J. B. Cross, V. Bakken, C. Adamo, J. Jaramillo, R. Gomperts, R. E. Stratmann, O. Yazyev, A. J. Austin, R. Cammi, C. Pomelli, J. W. Ochterski, R. L. Martin, K. Morokuma, V. G. Zakrzewski, G. A. Voth, P. Salvador, J. J. Dannenberg, S. Dapprich, A. D. Daniels, Ö. Farkas, J. B. Foresman, J. V. Ortiz, J. Cioslowski, D. J. Fox, Gaussian, Inc., Wallingford CT, **2009**.
- [3] Y.-T. Wu, D. Bandera, R. Maag, A. Linden, K. K. Baldrige, J. S. Siegel, *J. Am. Chem. Soc.* **2008**, *130*, 10729-10739.

## Author Contributions

((Please specify the contributions of each author including the type (e.g. data curation, funding acquisition, formal analysis, investigation, project administration, validation, writing of original draft) and the degree (e.g. lead, equal, supporting) of contribution.))
